# Supplementary material
Source: PubMed Central journal article supplement (PMC5098451)
Supplement: kmab-08-08-1222342-s001.pdf [file kmab-08-08-1222342-s001.pdf]

## SUPPLEMENTAL INFORMATION

### Charge-mediated Fab-Fc interactions in an IgG1 mAb induce reversible self-association, antibody cluster formation, and elevated viscosity

Jayant Arora<sup>1,2</sup>, Yue Hu<sup>1,2</sup>, Reza Esfandiary<sup>3</sup>, Hasige A. Sathish<sup>3</sup>, Steven M. Bishop<sup>3</sup>, Sangeeta B. Joshi<sup>1,2</sup>, C. Russell Middaugh<sup>1,2</sup>, David B. Volkin<sup>1,2,\*</sup>, David D. Weis<sup>1,4,\*</sup>

<sup>1</sup>Department of Pharmaceutical Chemistry, University of Kansas, Lawrence, Kansas, USA, 66047

<sup>2</sup>Macromolecule and Vaccine Stabilization Center, University of Kansas, Lawrence, Kansas, USA, 660475

<sup>3</sup>Department of Formulation Sciences, MedImmune LLC, Gaithersburg, Maryland, USA 20878

<sup>3</sup>Department of Chemistry and R.N. Adams Institute of Bioanalytical Chemistry, University of Kansas, Lawrence, Kansas, USA, 66045

\* Correspondence to Authors

David B. Volkin: email, [volkin@ku.edu](mailto:volkin@ku.edu); phone, (785) 864-6262

David D. Weis: email, [dweis@ku.edu](mailto:dweis@ku.edu); phone, (785) 864-1377

#### Contact Information:

Jayant Arora (Department of Pharmaceutical Chemistry, Macromolecule and Vaccine Stabilization Center, University of Kansas, Lawrence, KS 66047; [jayant.arora@ku.edu](mailto:jayant.arora@ku.edu))

Yue Hu (Department of Pharmaceutical Chemistry, Macromolecule and Vaccine Stabilization Center, University of Kansas, Lawrence, KS 66047; [y163h421@ku.edu](mailto:y163h421@ku.edu))

Reza Esfandiary (Department of Formulation Sciences, MedImmune, One MedImmune Way, Gaithersburg, MD 20878; [esfandiaryr@medimmune.com](mailto:esfandiaryr@medimmune.com); Telephone: +301-398-2014; Fax: +301-398-9478)

Hasige A. Sathish (Department of Formulation Sciences, MedImmune, One MedImmune Way, Gaithersburg, MD 20878; [sathishh@medimmune.com](mailto:sathishh@medimmune.com); Telephone: +301-398-5436; Fax: 301-398-7825)

Steven M. Bishop (Department of Formulation Sciences, MedImmune, One MedImmune Way, Gaithersburg, MD 20878; [bishops@medimmune.com](mailto:bishops@medimmune.com); Telephone: +301-398-4672; Fax: 301-398-9672)

Sangeeta B. Joshi (Department of Pharmaceutical Chemistry, Macromolecule and Vaccine Stabilization Center, University of Kansas, Lawrence, KS 66047; [joshi@ku.edu](mailto:joshi@ku.edu); Telephone: +785-864-3356; Fax: +785-864-5814)

C. Russell Middaugh (Department of Pharmaceutical Chemistry, Macromolecule and Vaccine Stabilization Center, University of Kansas, Lawrence, KS 66047; [middaugh@ku.edu](mailto:middaugh@ku.edu); Telephone: +785-864-5813; Fax: +785-864-5814)

David B. Volkin (Department of Pharmaceutical Chemistry, Macromolecule and Vaccine Stabilization Center, University of Kansas, Lawrence, KS 66047; volkin@ku.edu; Telephone: +785-864-6262; Fax: +785-864-5736)

David D. Weis (Department of Chemistry, 1251 Wescoe Hall Drive, University of Kansas, Lawrence, KS 66045; dweis@ku.edu; Telephone: +785-864-1377; Fax: +785-864-5396)

## **SUPPLEMENTAL RESULTS**

### **Post-lyophilization biophysical characterization suggests no change in mAb-J structure and aggregation profile**

Lyophilization can introduce unwanted stress and cause structural destabilization of proteins leading to protein aggregation.<sup>1, 2</sup> A combination of circular dichroism (CD), size exclusion chromatography (SEC), and viscosity measurements was used to ensure preservation of mAb-J structural integrity post lyophilization. Comparison of CD spectra of non-lyophilized mAb-J control at 5 and 60 g/L (diluted to 0.3 g/L for CD) and reconstituted mAb-J samples revealed no changes in the secondary structure caused by the lyophilization/reconstitution process (see Figure S1A). All samples of lyophilized mAb-J were diluted to 0.5 g/L for SEC. Figure S1B compares SEC profiles of non-lyophilized mAb-J control and lyophilized mAb-J samples. No increase in soluble aggregate or fragment population was observed in lyophilized samples after reconstitution, although a slight decrease in the monomer content was observed. Monomer loss is attributed to a small increase in insoluble aggregate content (Table S3). Since all samples were centrifuged prior to analysis, the insoluble aggregate did not alter the HX measurements. To make sure that mAb-J samples undergo reversible self-association after lyophilization/reconstitution process, the viscosity of reconstituted mAb-J samples at 5 and 60 g/L was compared to non-lyophilized control. There were no differences in viscosity between the two set of samples (Figure S1C). Post-lyophilization biophysical characterization confirmed that our optimized lyophilization cycle does not introduce unwanted structural artifacts in mAb-J samples and it can therefore be utilized for HX-MS experiments.

## **REFERENCES**

1. Carpenter J, Prestrelski S, Arakawa T. Separation of freezing-and drying-induced denaturation of lyophilized proteins using stress-specific stabilization: I. Enzyme activity and calorimetric studies. *Arch Biochem Biophys* 1993; 303:456-64.

2. Carpenter JF, Chang BS, Garzon-Rodriguez W, Randolph TW. Rational design of stable lyophilized protein formulations: theory and practice. Springer, 2002.
3. Kavan D, Man P. MSTools—Web based application for visualization and presentation of HXMS data. Int J Mass Spectrom 2011; 302:53-8.

### **SUPPLEMENTAL FIGURE CAPTIONS**

**Figure S1:** Post-lyophilization biophysical characterization of mAb-J. (A) Circular dichroism (CD) spectra showing the effect of lyophilization process on secondary structure of mAb-J. (B) Size exclusion chromatography (SEC) chromatograms comparing pre and post lyophilization mAb-J samples. (C) Solution dynamic viscosity measurements comparing pre- and post-lyophilization mAb-J samples to test the effect of lyophilization on mAb-J protein-protein interactions. Samples of mAb-J were prepared in control buffer containing 10% (w/v) trehalose. Error bars in panel B and C represent one standard deviation from three independent measurements.

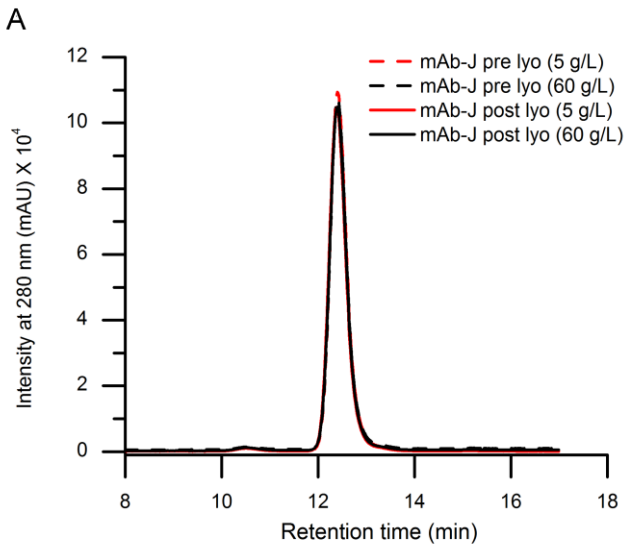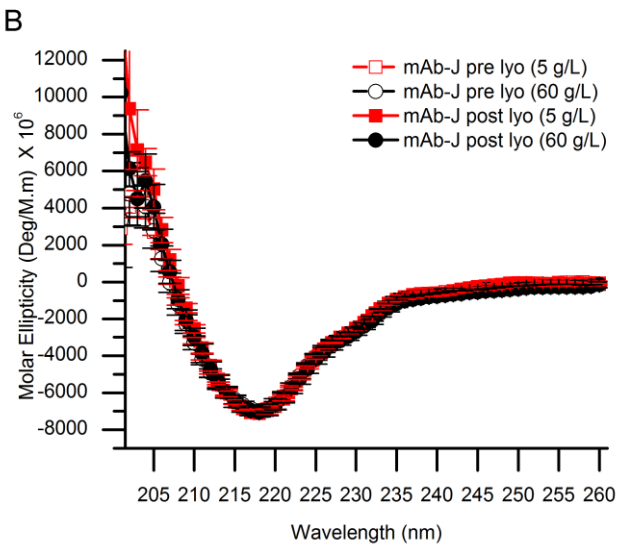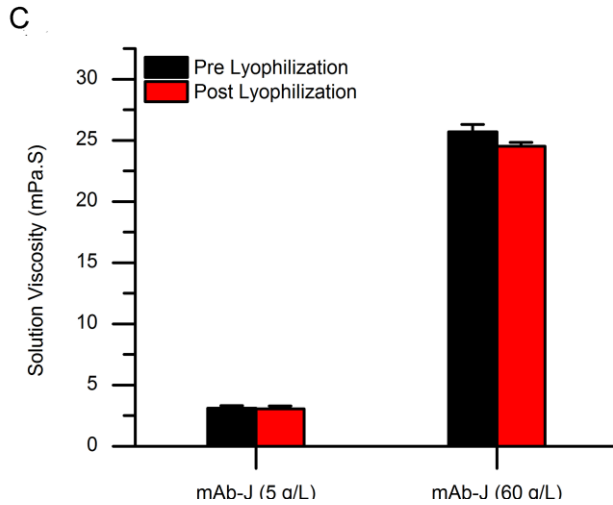

**Figure S2:** Peptic peptide coverage map of mAb-J (A) heavy chain and (B) light chain. 182 peptide segments of mAb-J covered 91% of heavy chain and 93% of light chain primary sequence. <sup>3</sup>

A

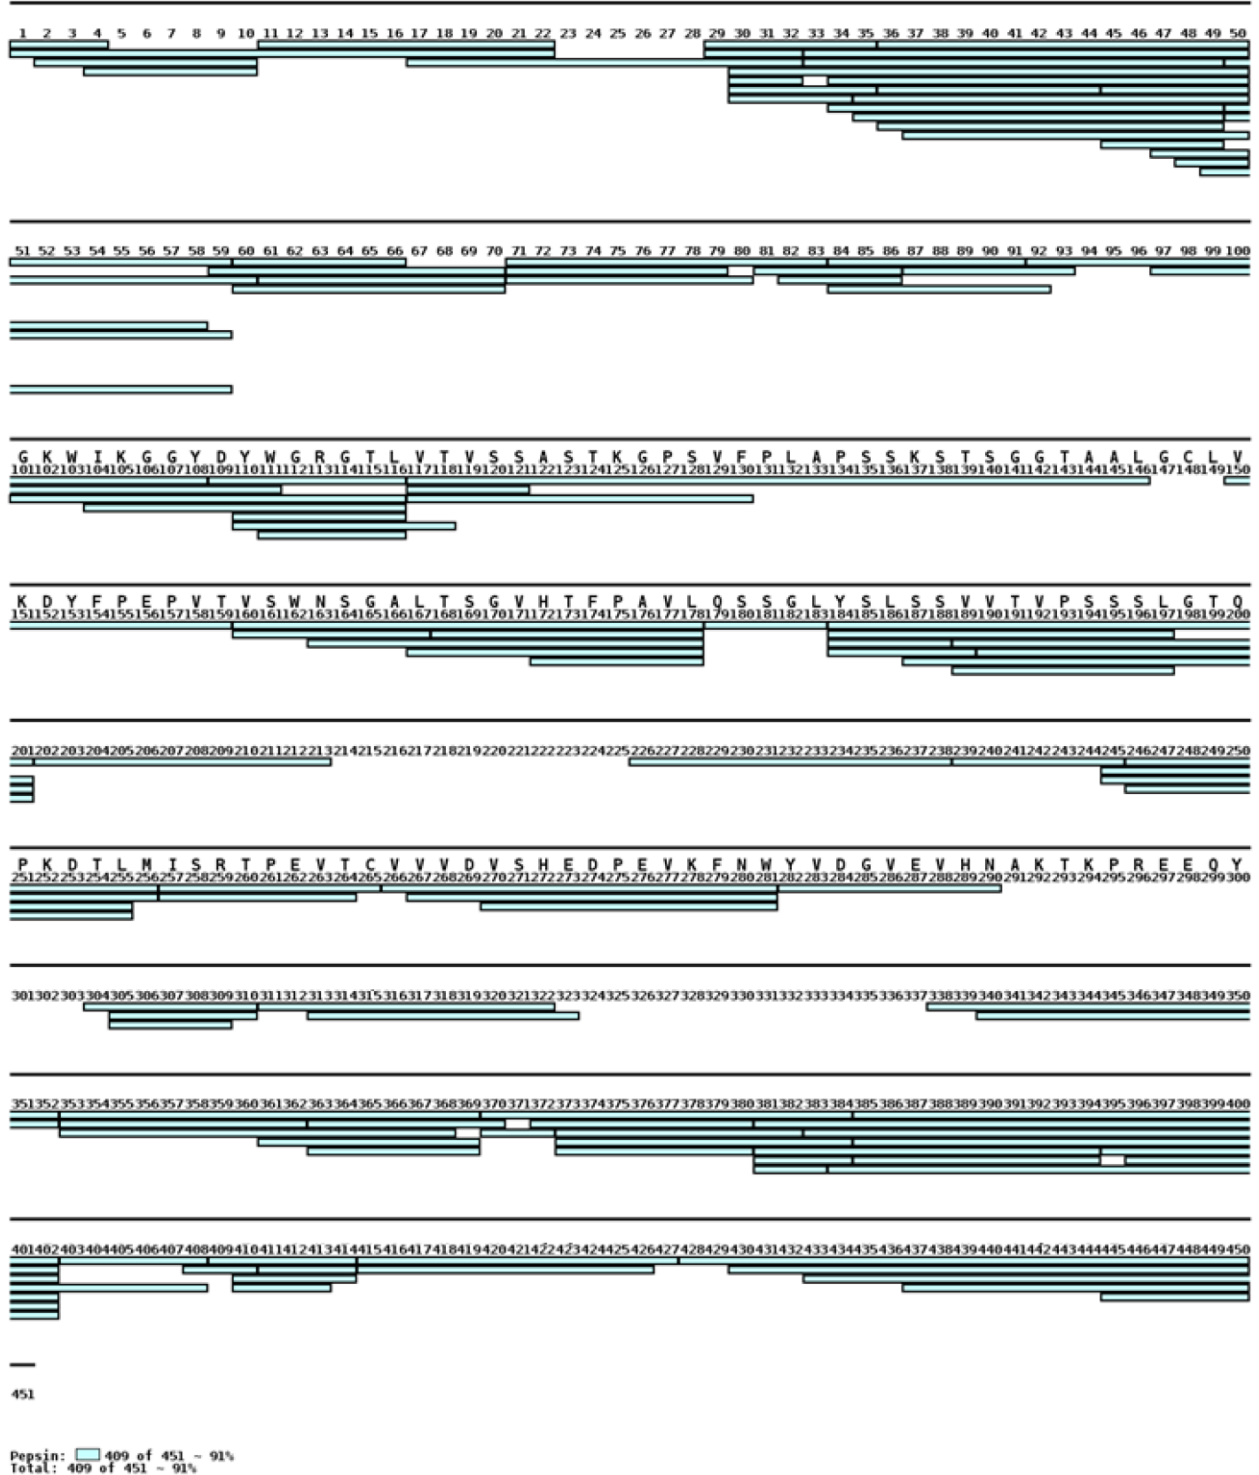

B

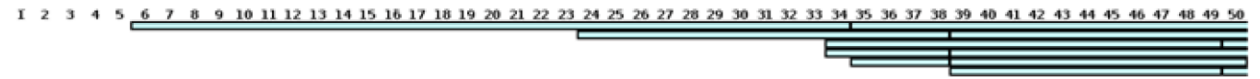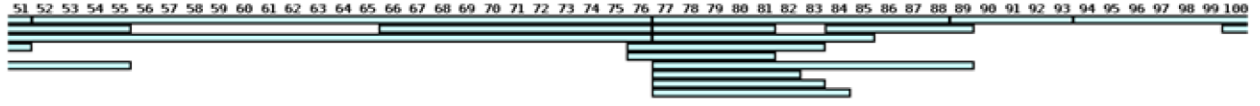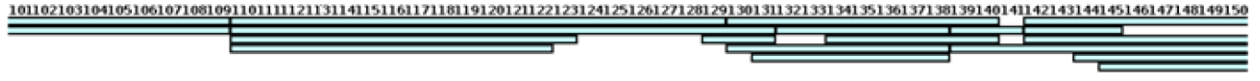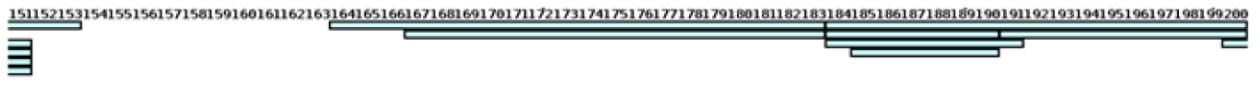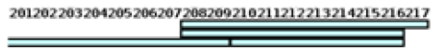

Pepsin:  202 of 217 - 93%  
Total: 202 of 217 - 93%



**Figure S3:** Deuterium uptake plots for 182 peptide segments of mAb-J comparing HX kinetics between 5 and 60 g/L mAb-J samples (orange and red, respectively). Domain location of the peptide is given in parentheses. Error bars represent one standard deviation from three independent HX experiments. The number of independent measurements for each peptide is denoted by n.

Mass Increase(Da)

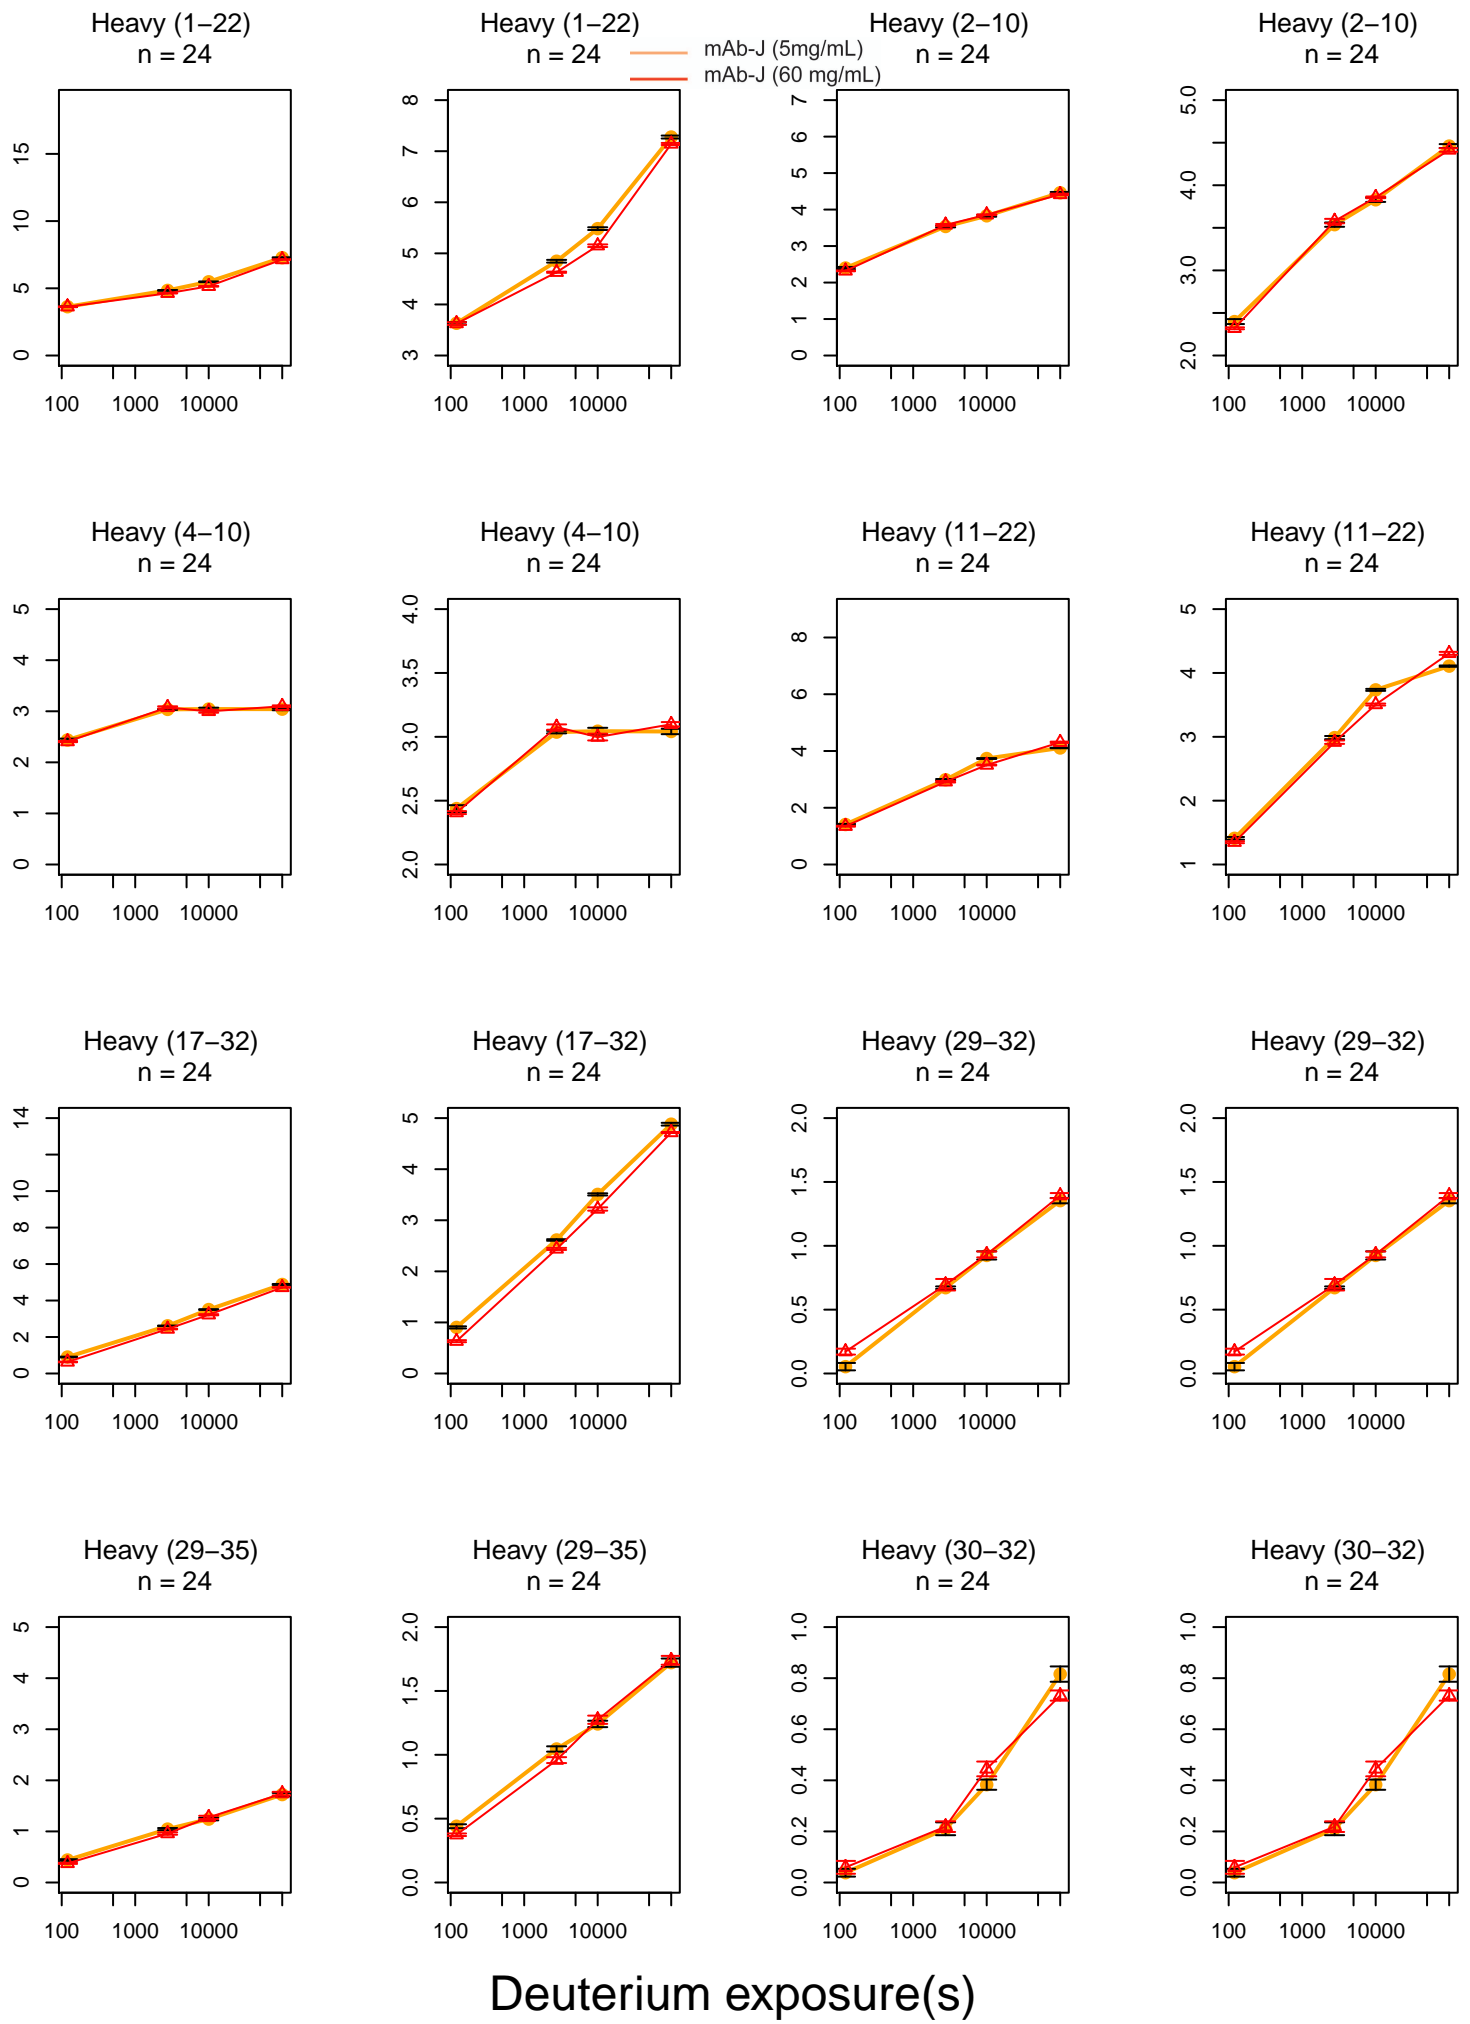

Mass Increase(Da)

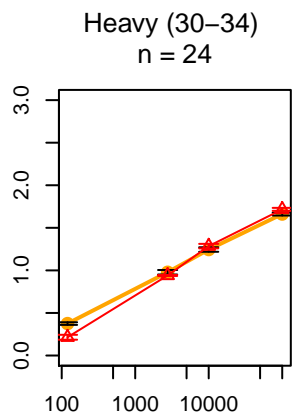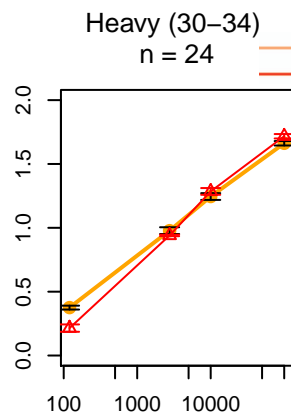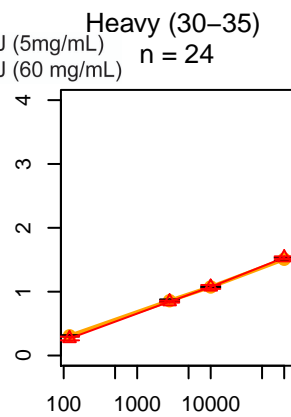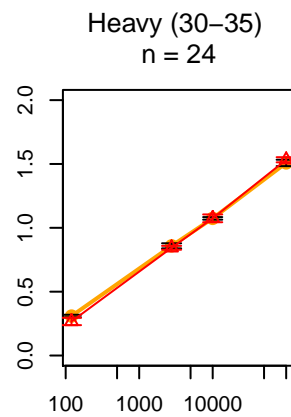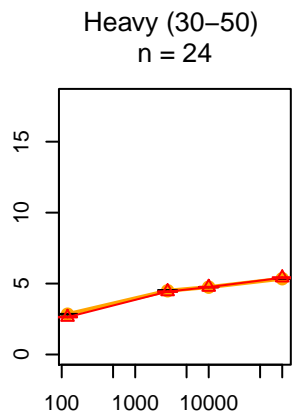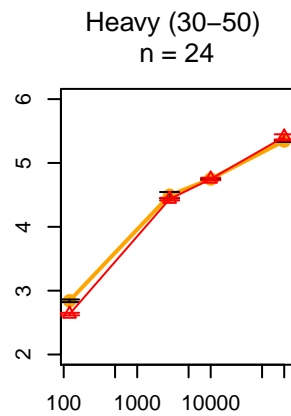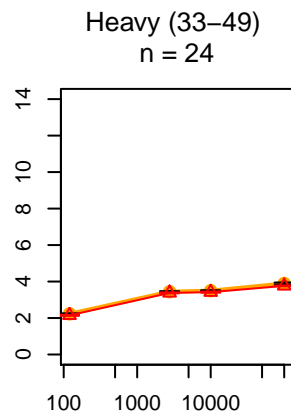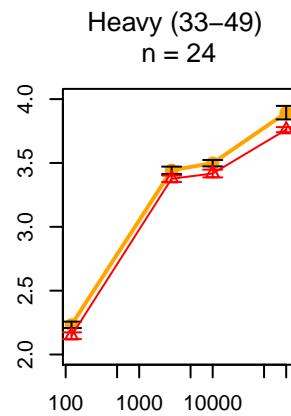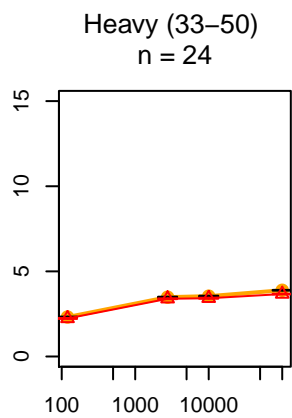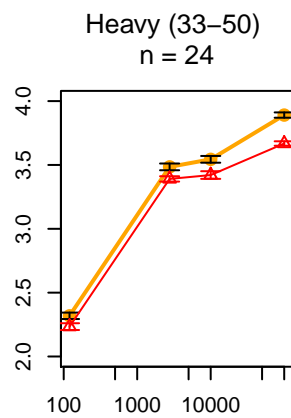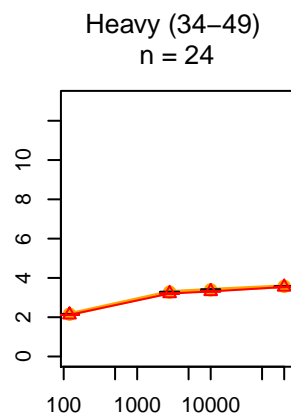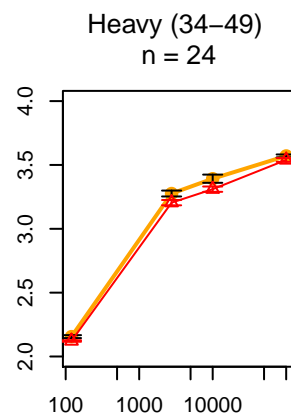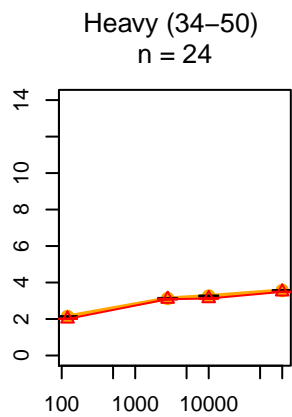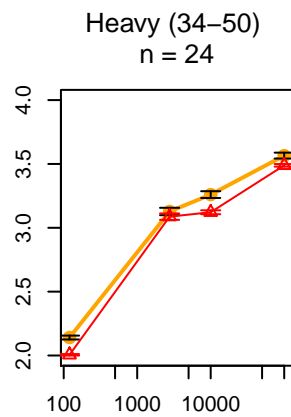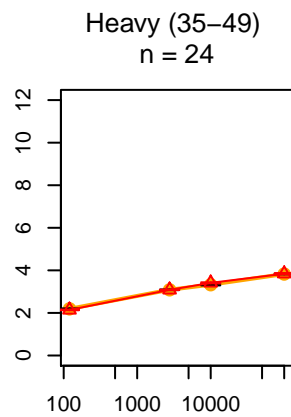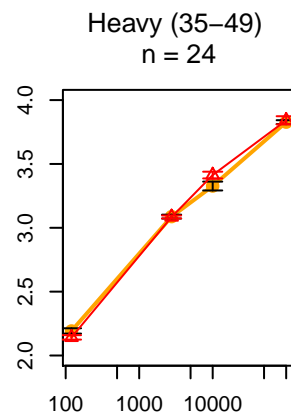

Deuterium exposure(s)

Mass Increase(Da)

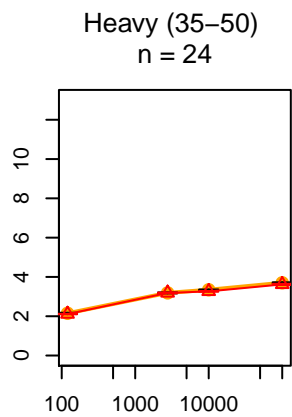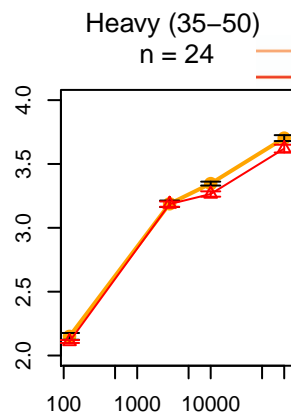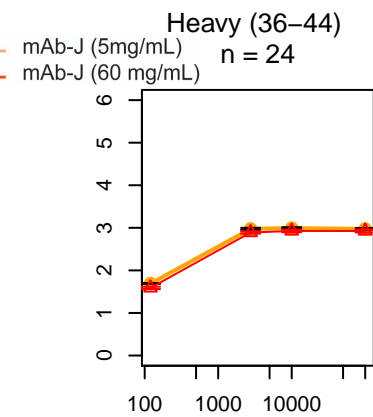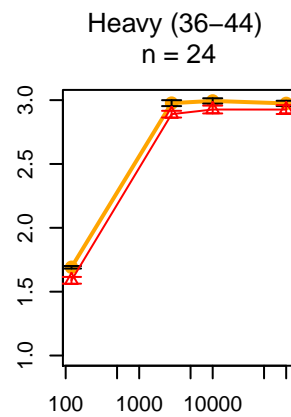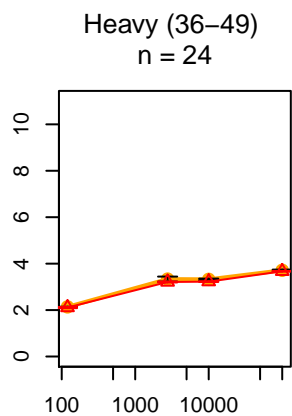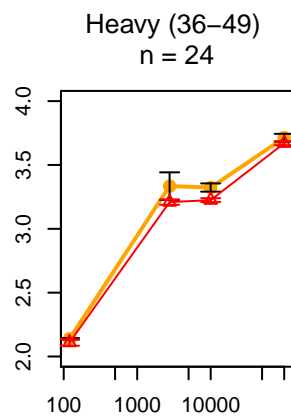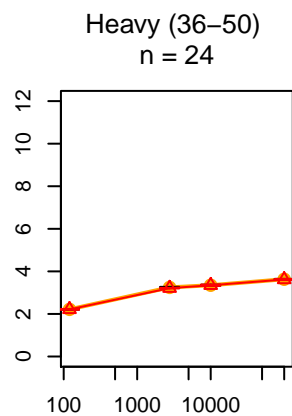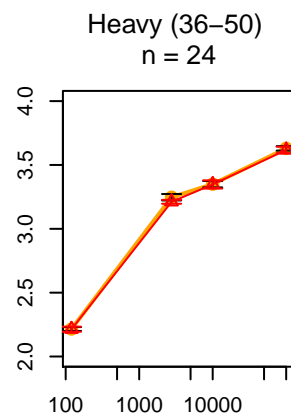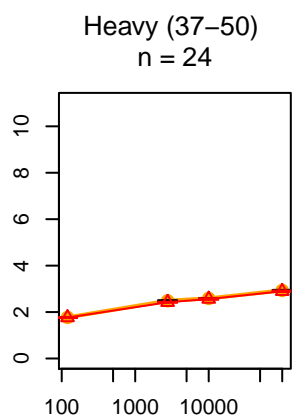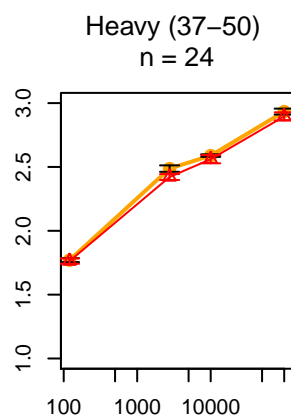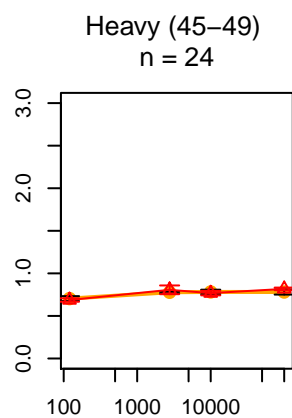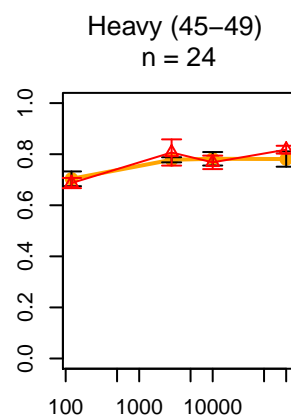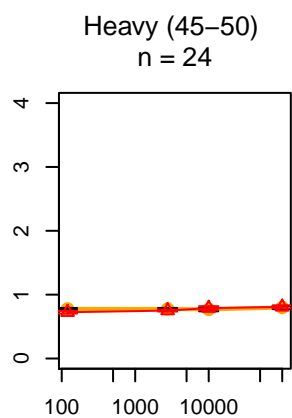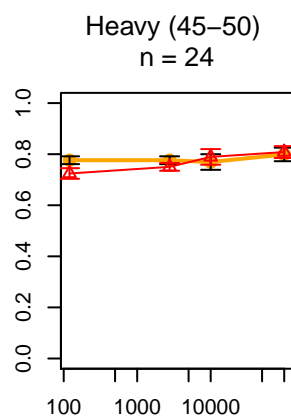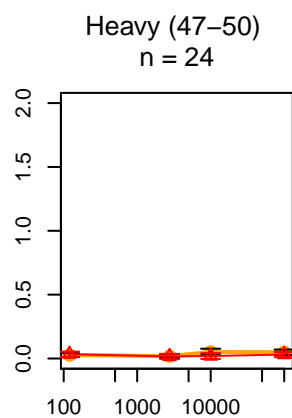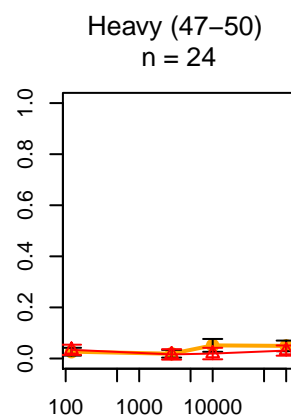

Deuterium exposure(s)

Mass Increase(Da)

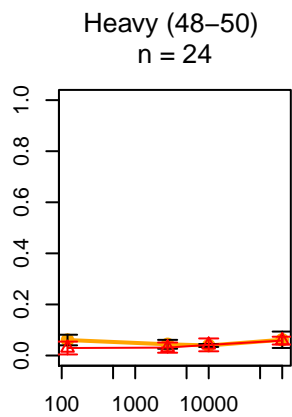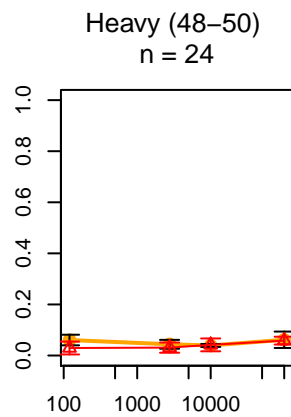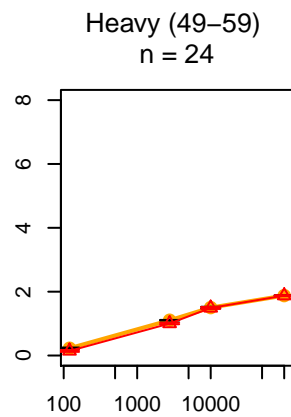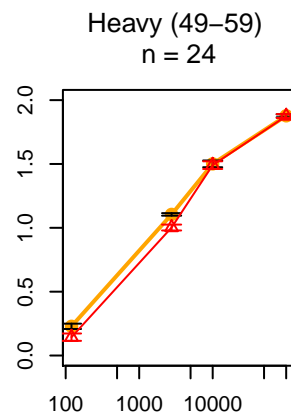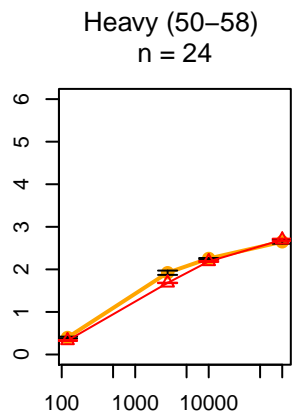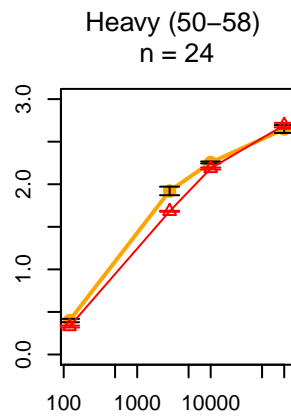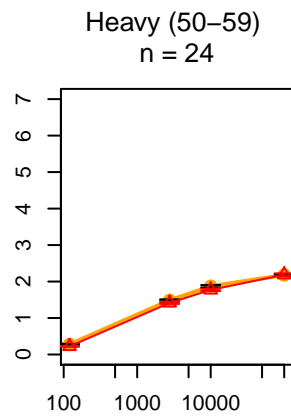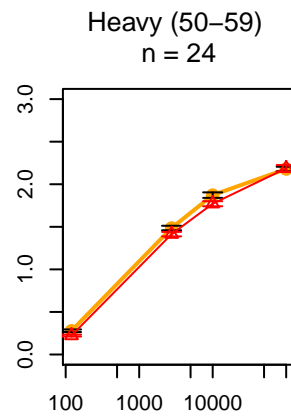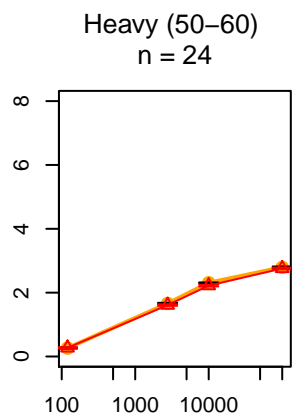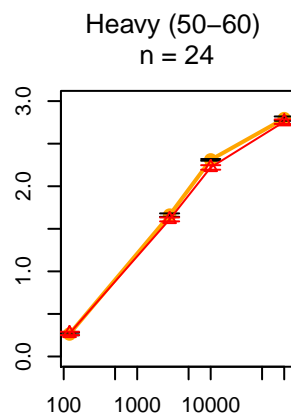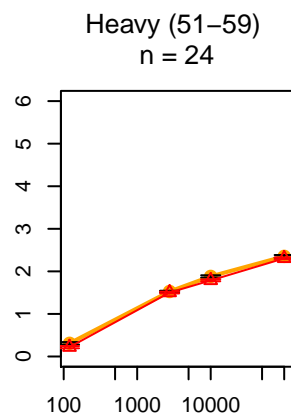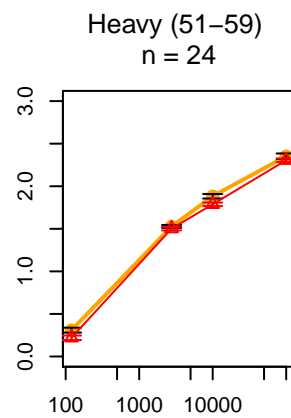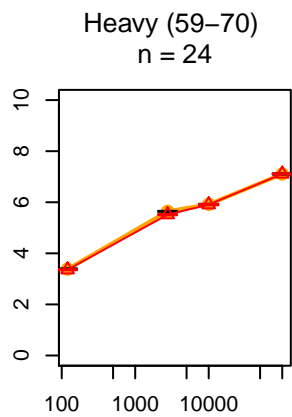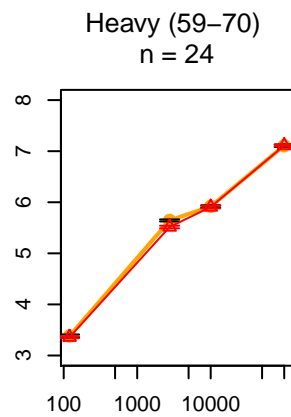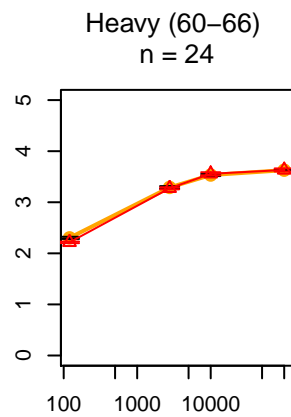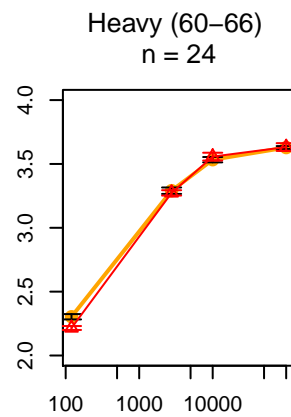

Deuterium exposure(s)

Mass Increase(Da)

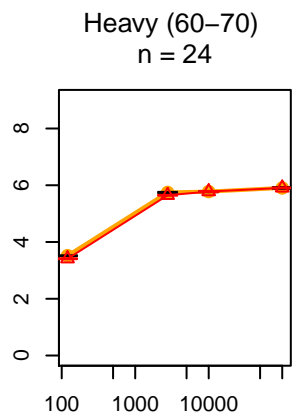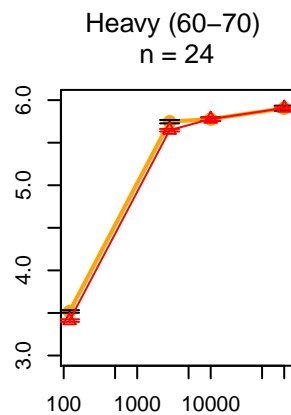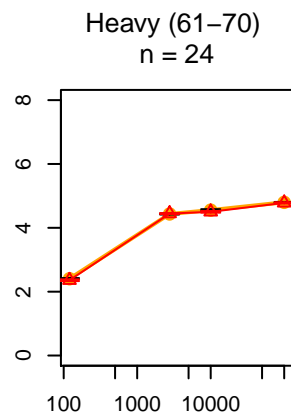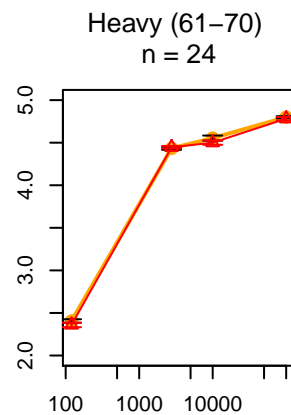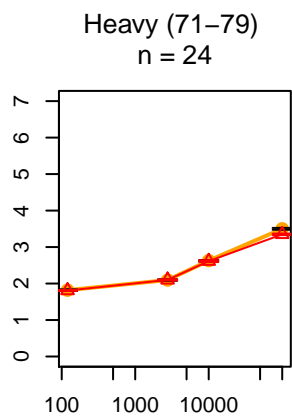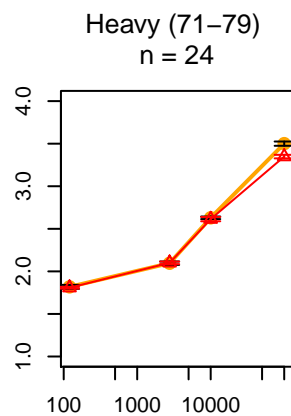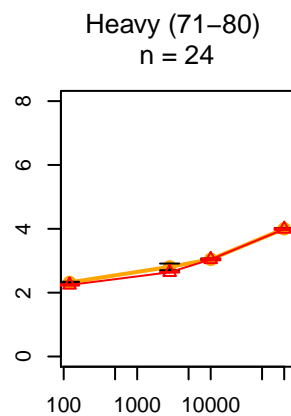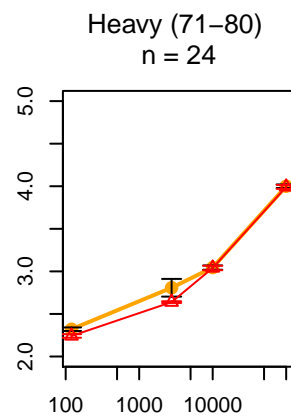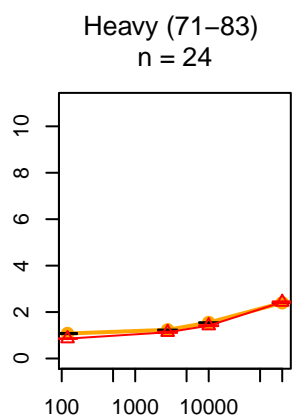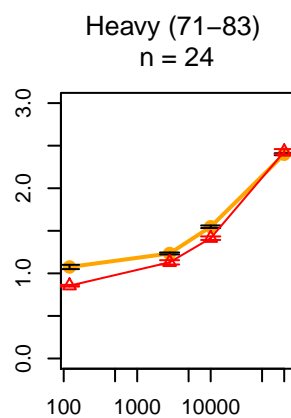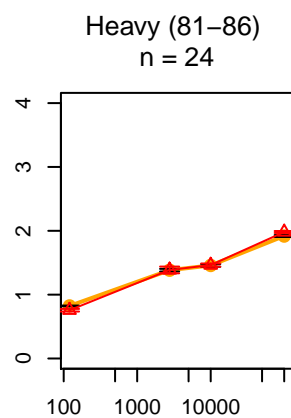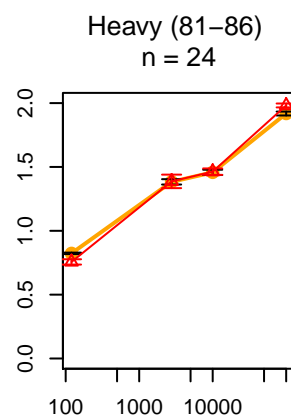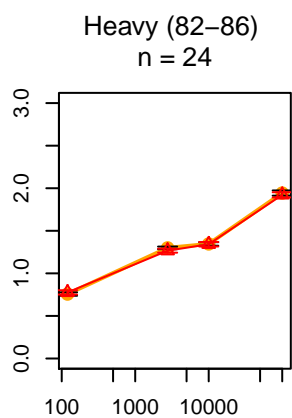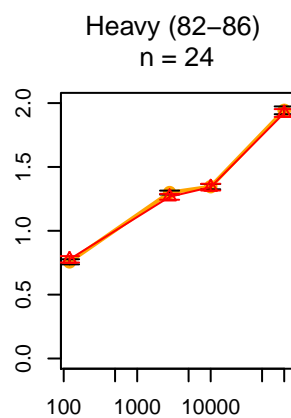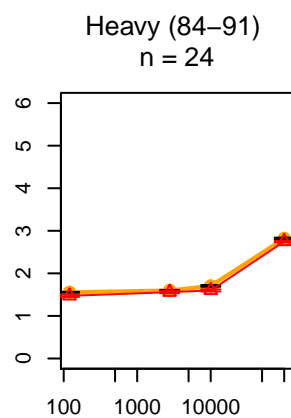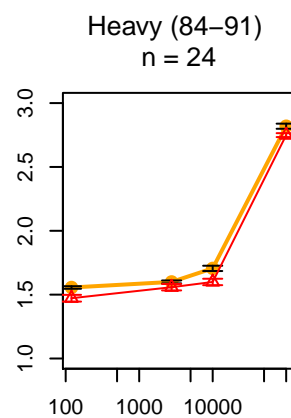

Deuterium exposure(s)

Mass Increase(Da)

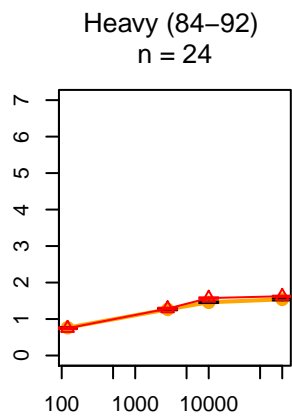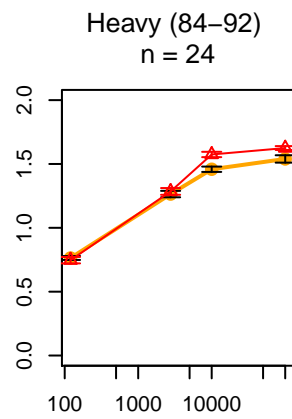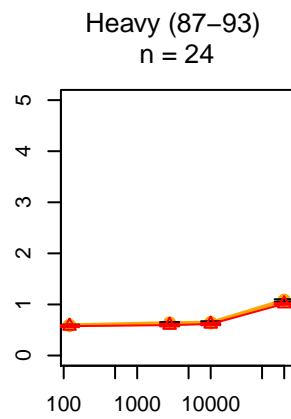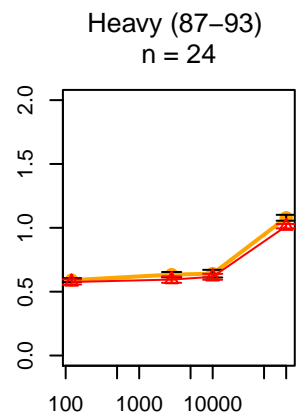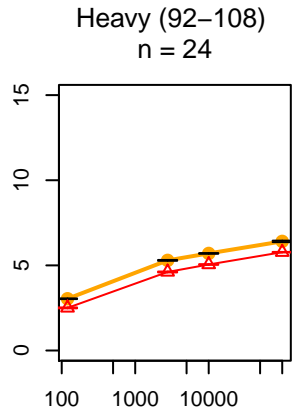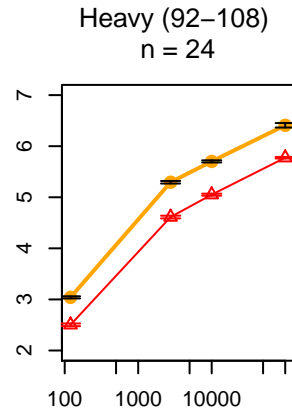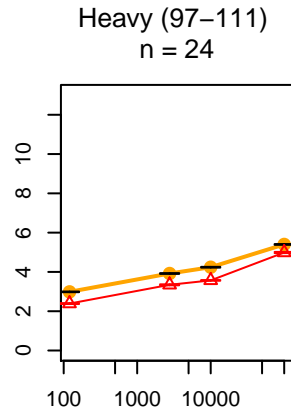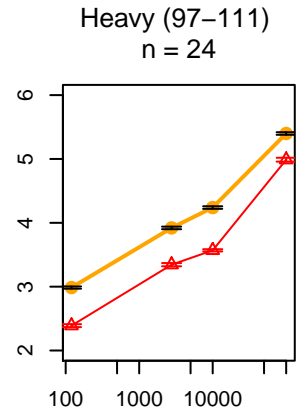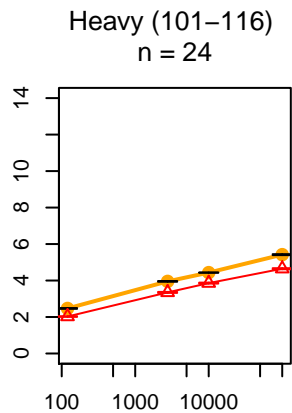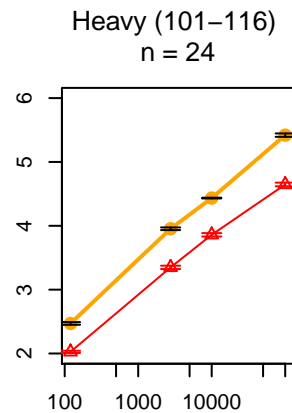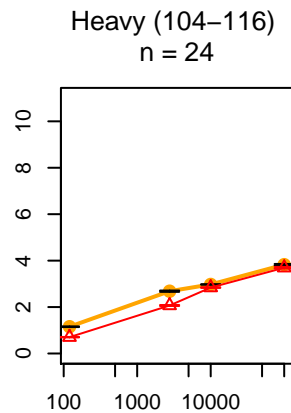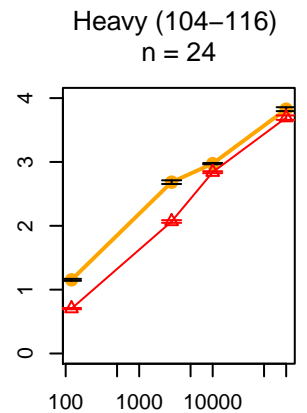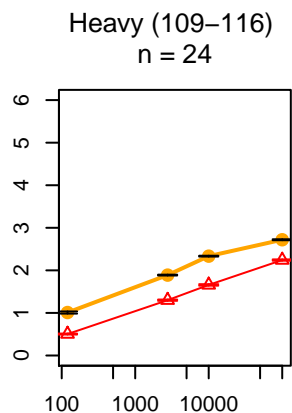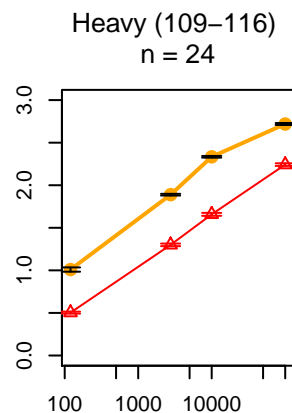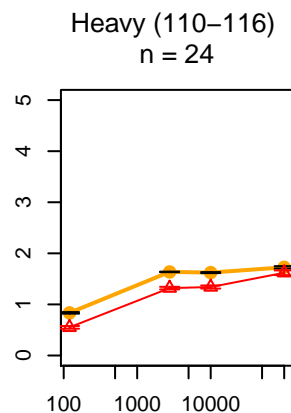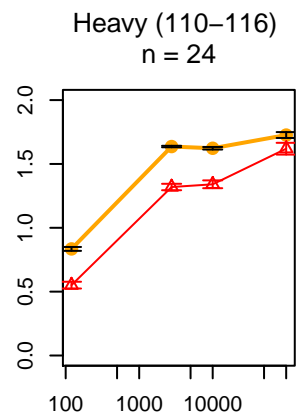

Deuterium exposure(s)

Mass Increase(Da)

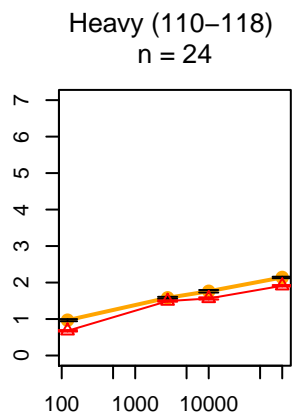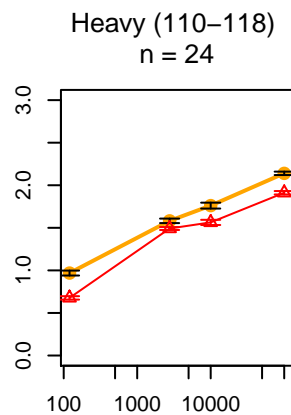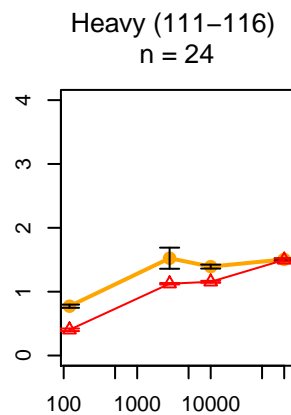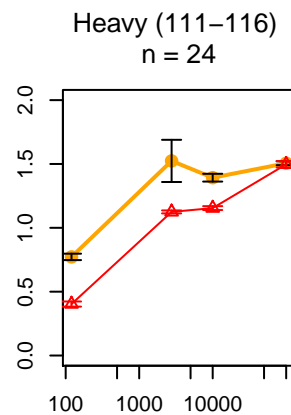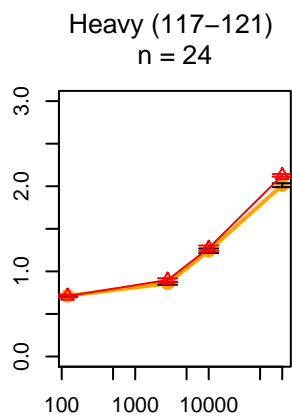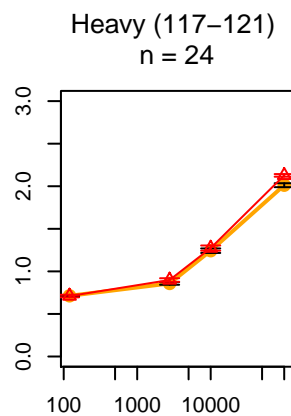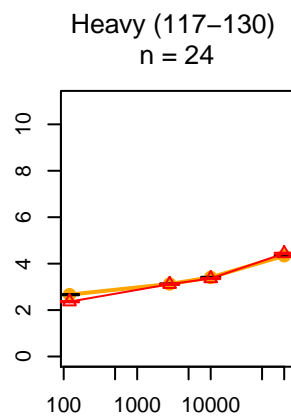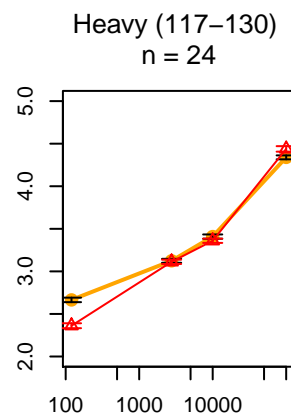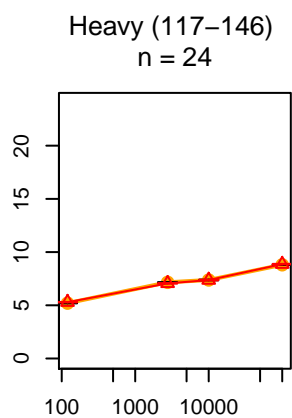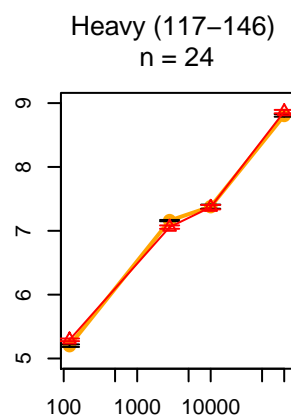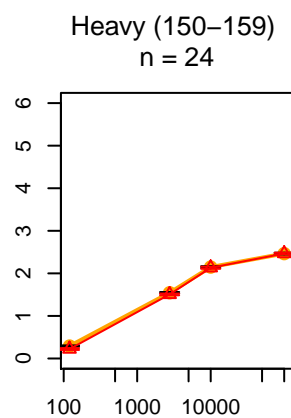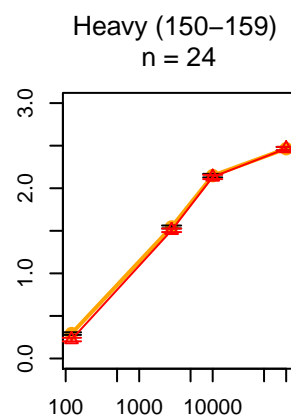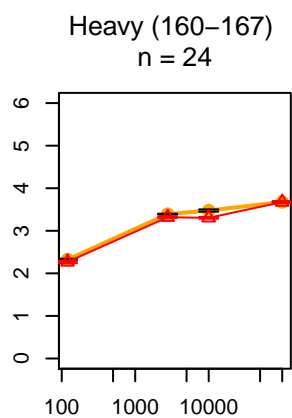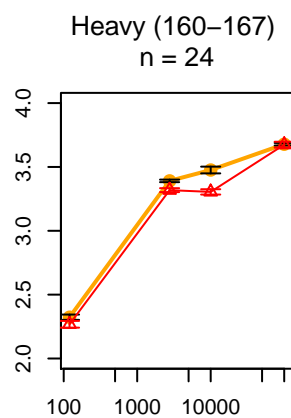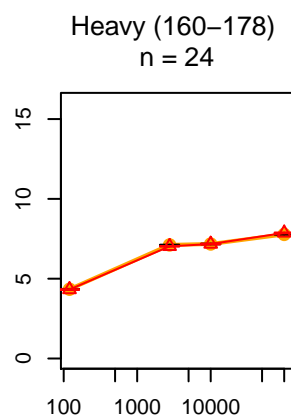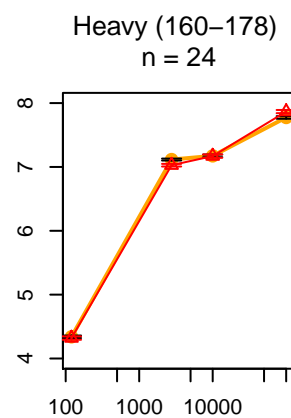

Deuterium exposure(s)



Mass Increase(Da)

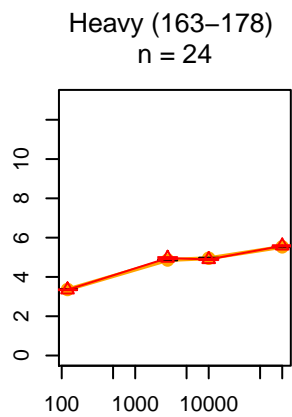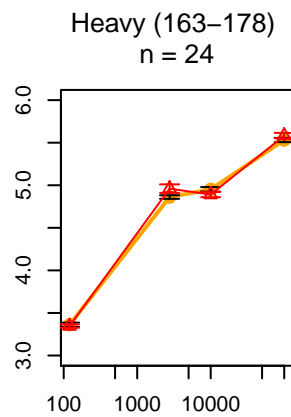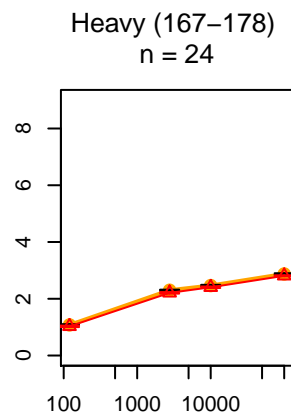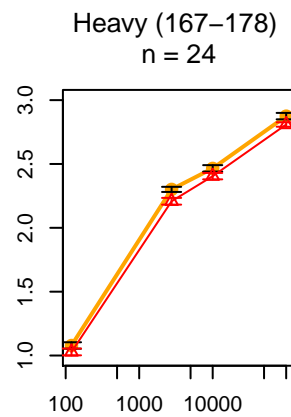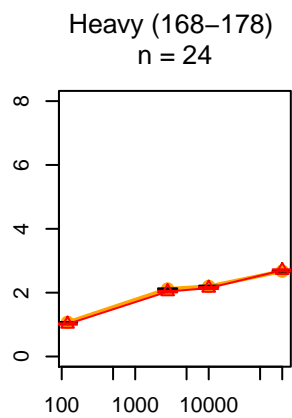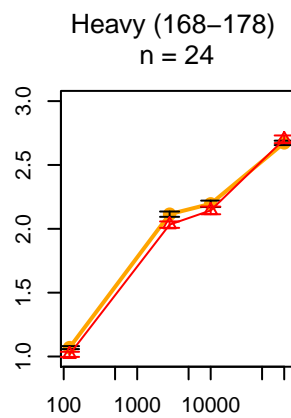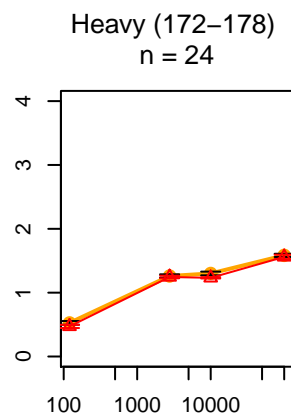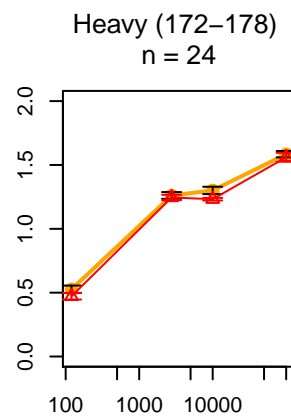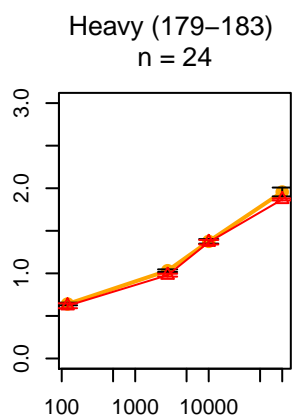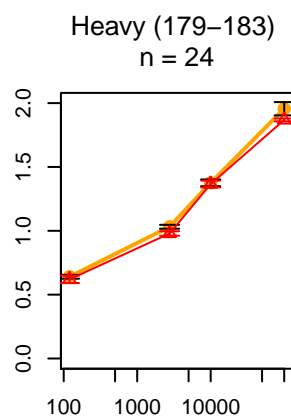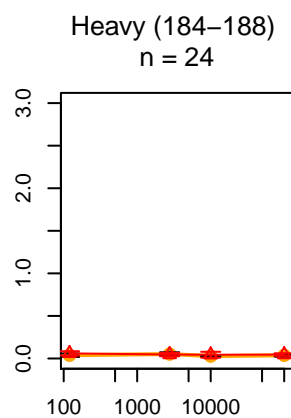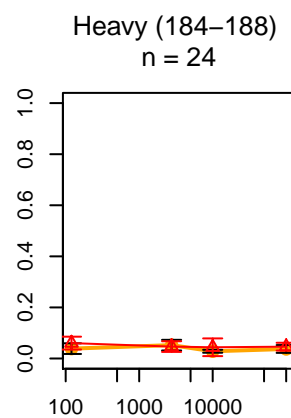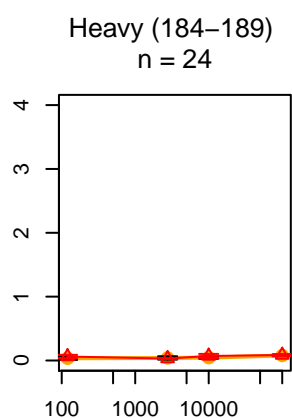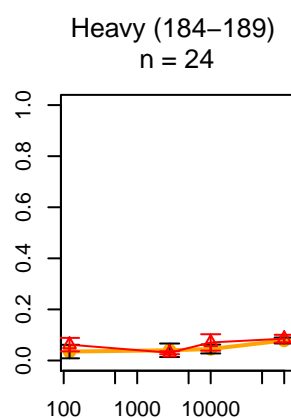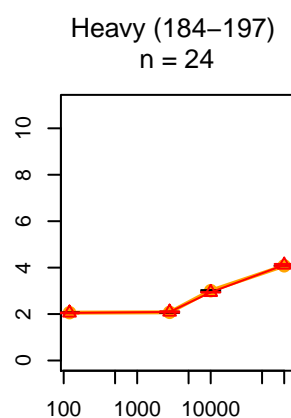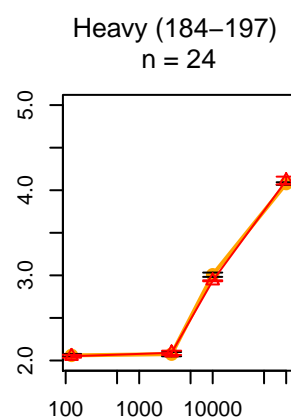

Deuterium exposure(s)

Mass Increase(Da)

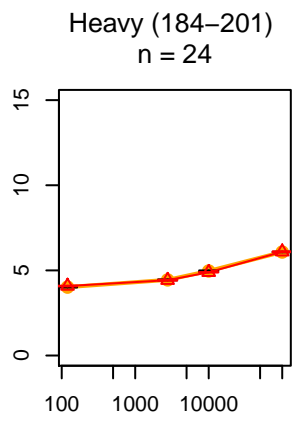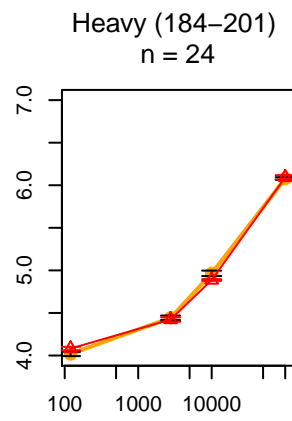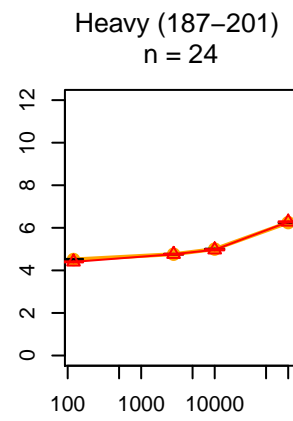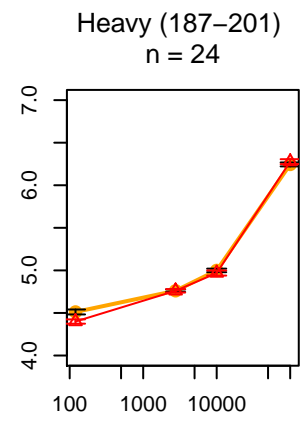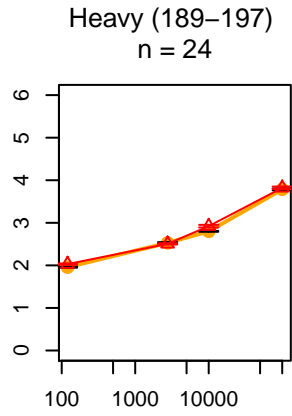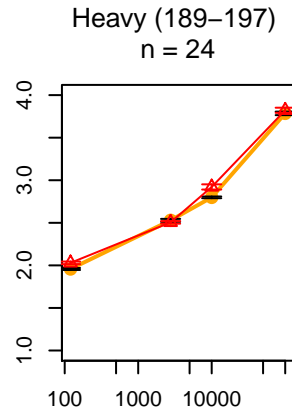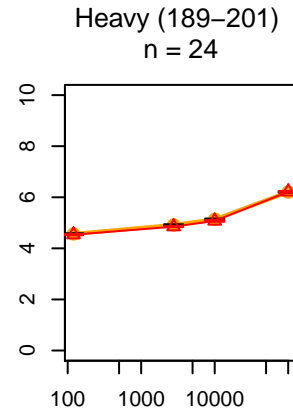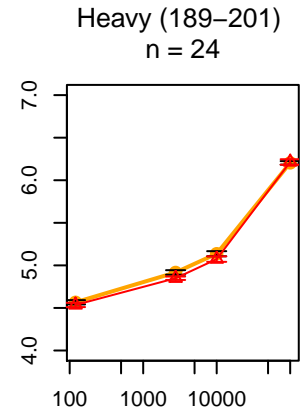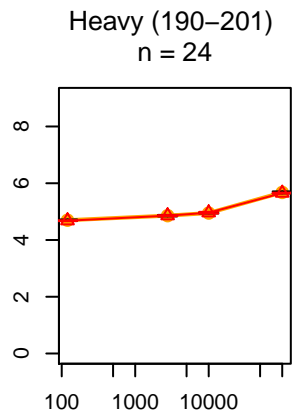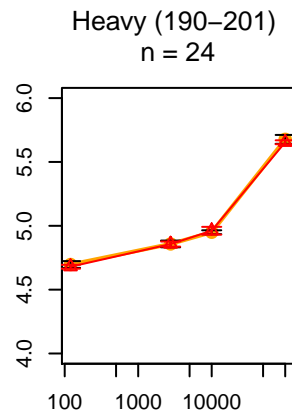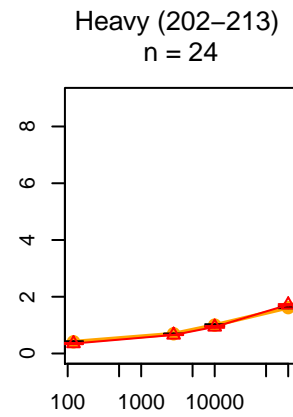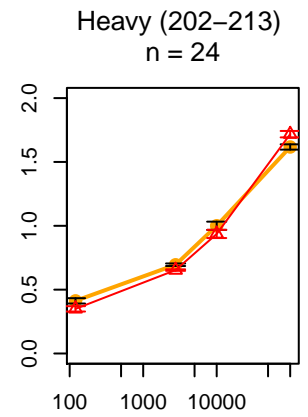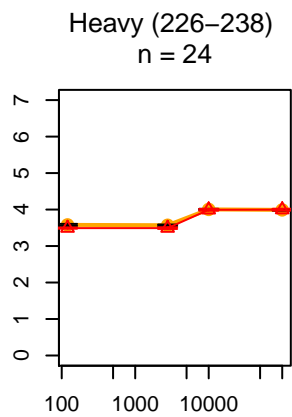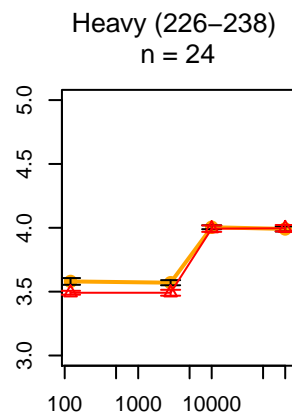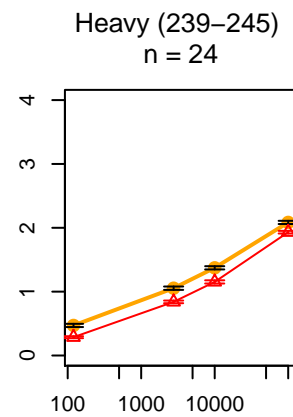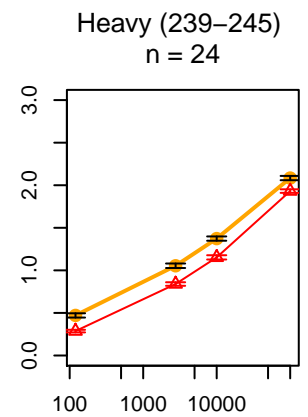

Deuterium exposure(s)

Mass Increase(Da)

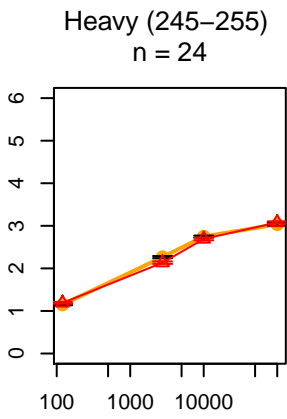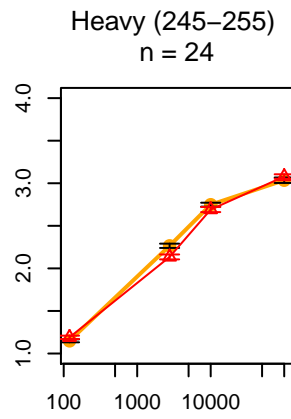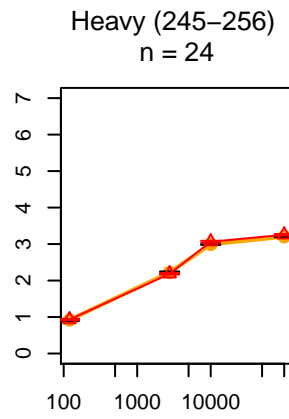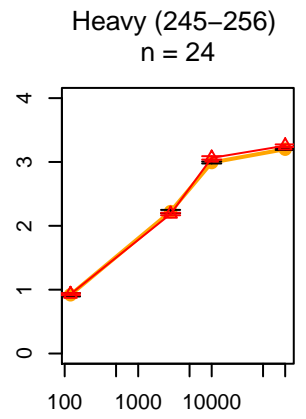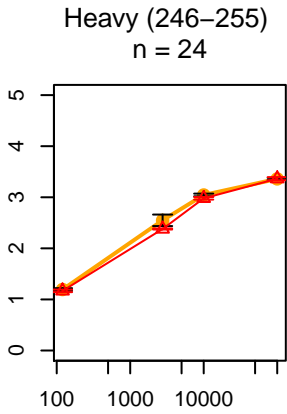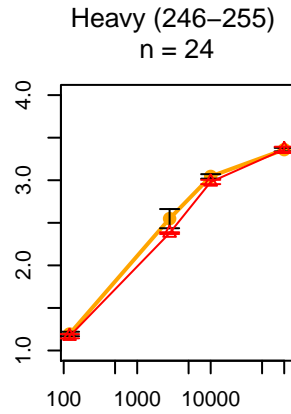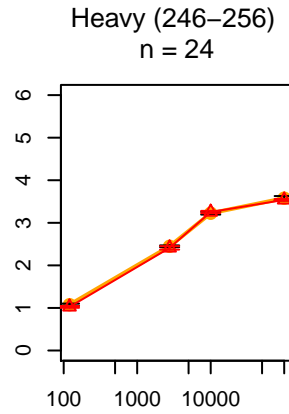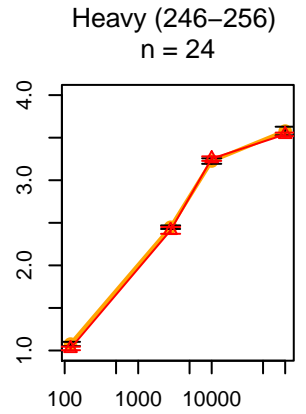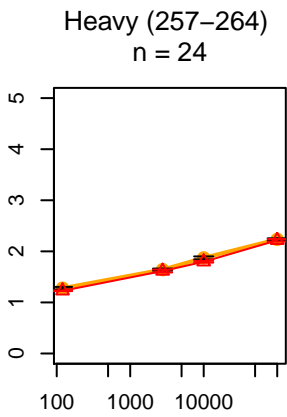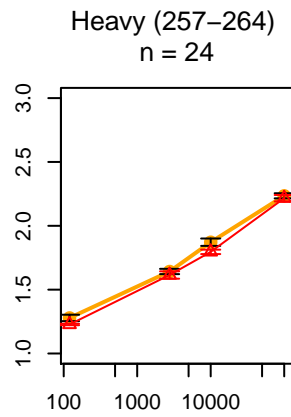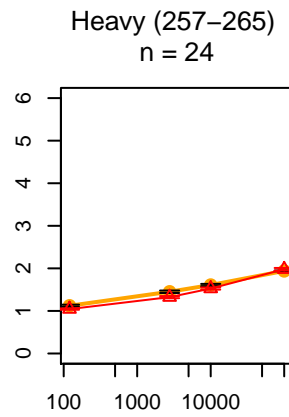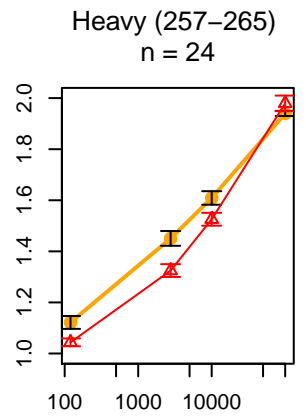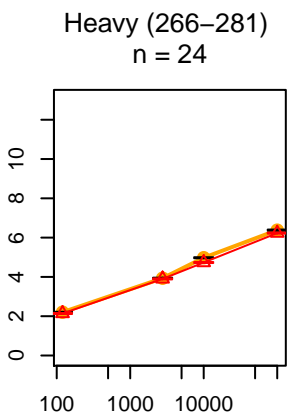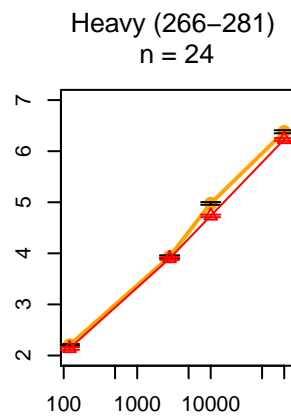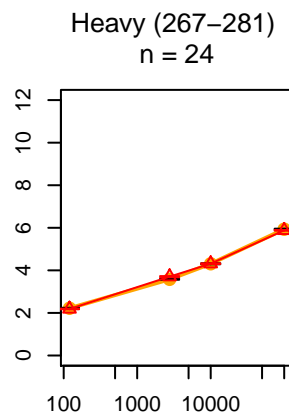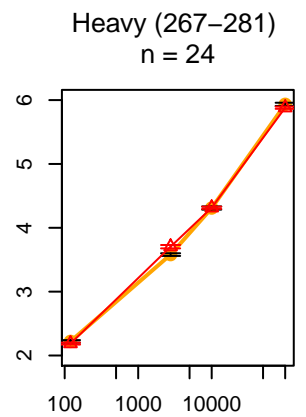

Deuterium exposure(s)

Mass Increase(Da)

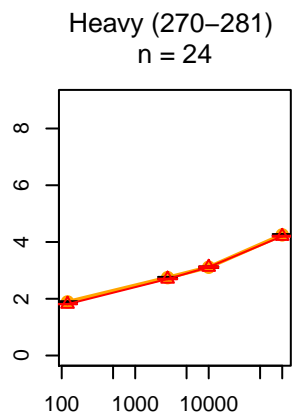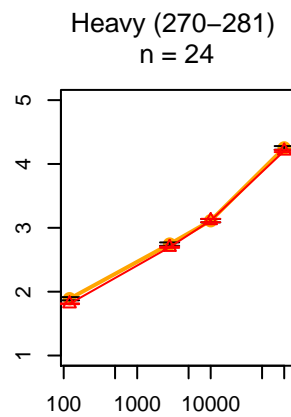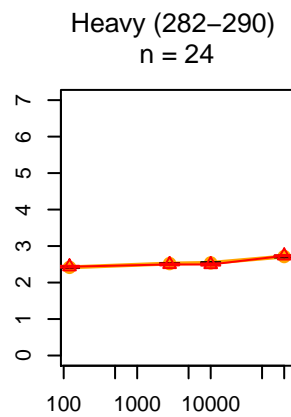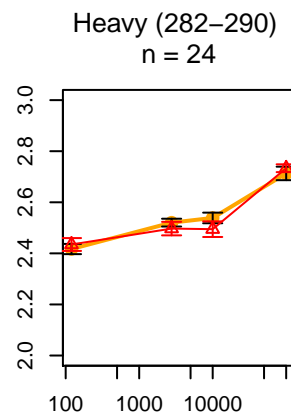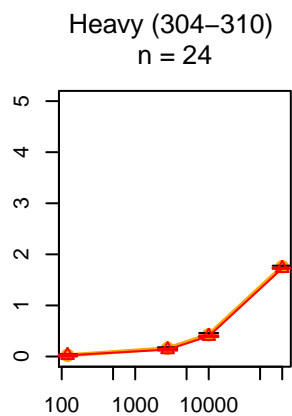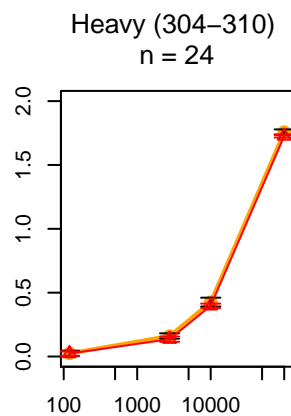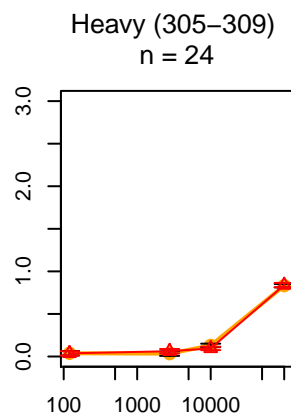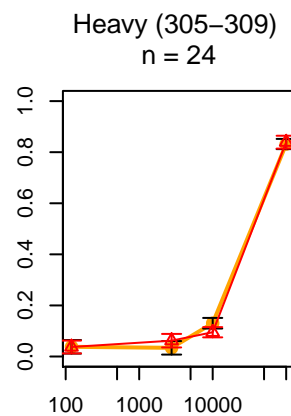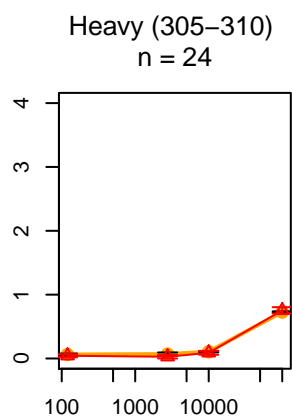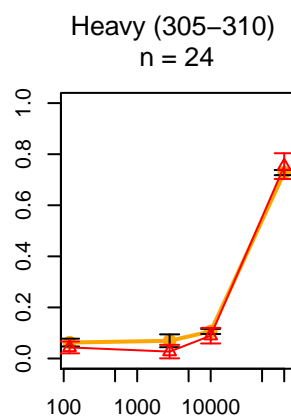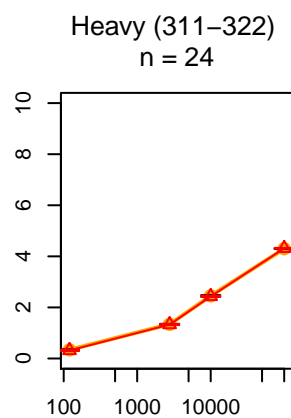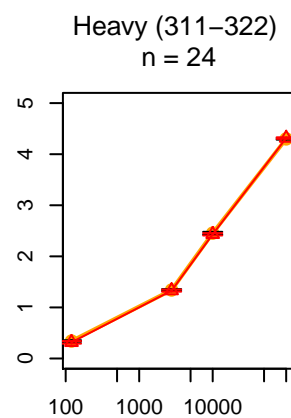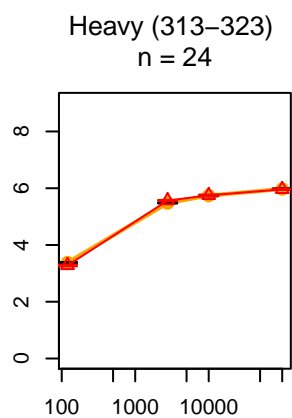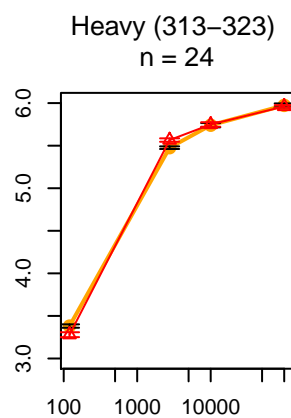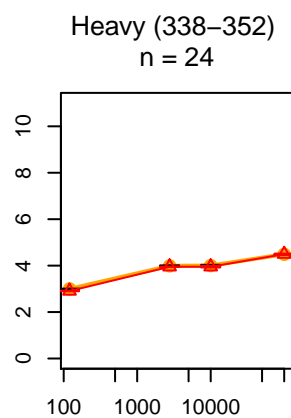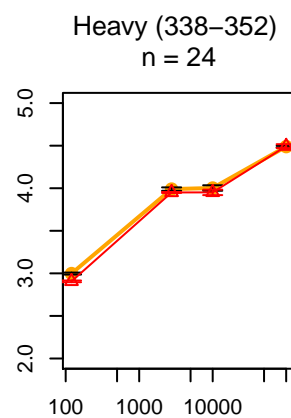

Deuterium exposure(s)

Mass Increase(Da)

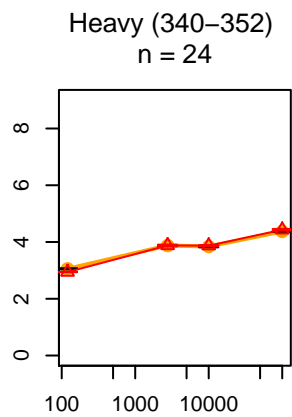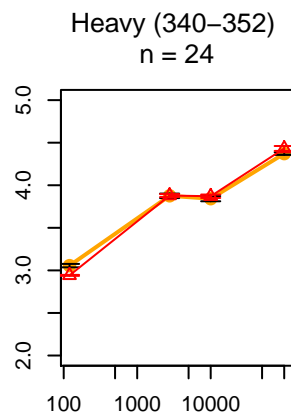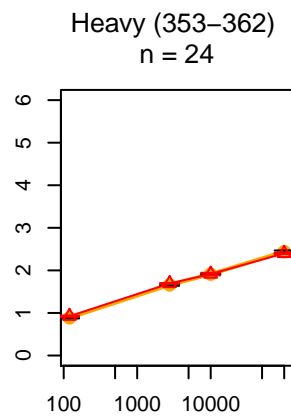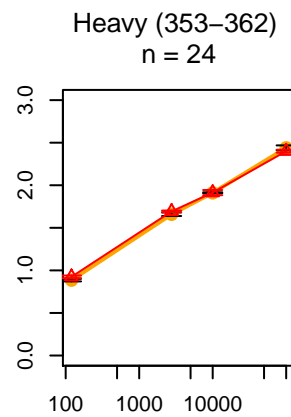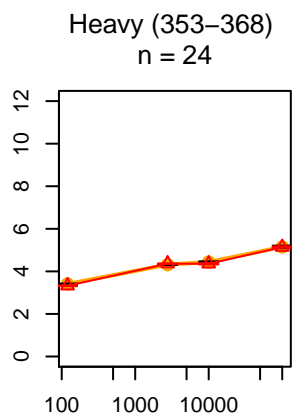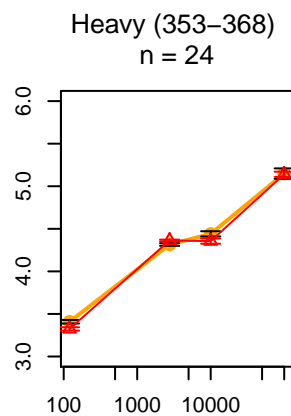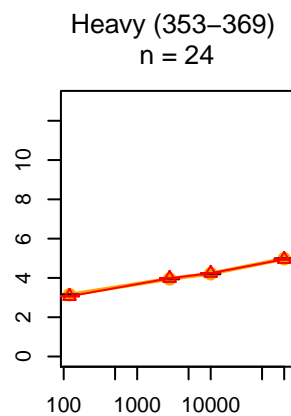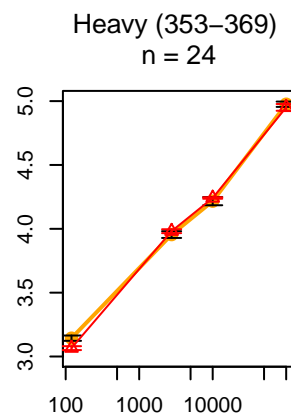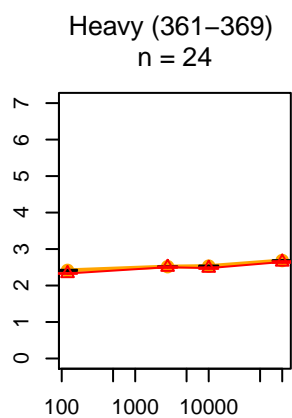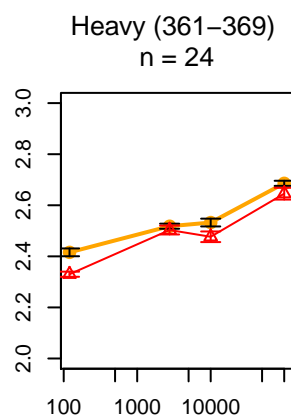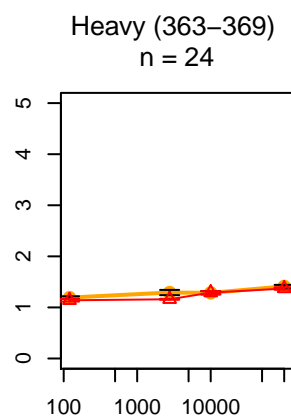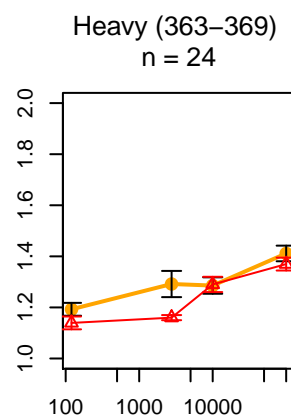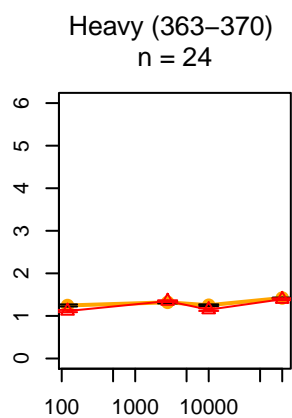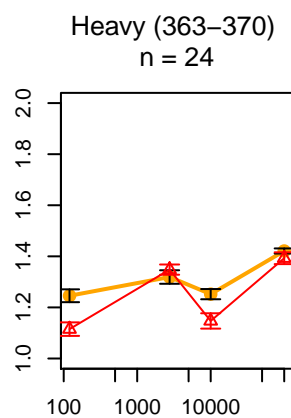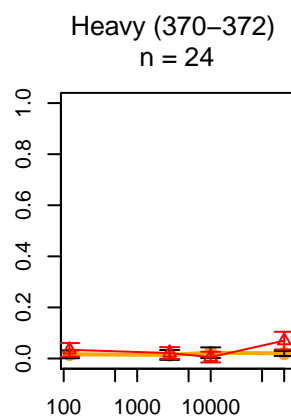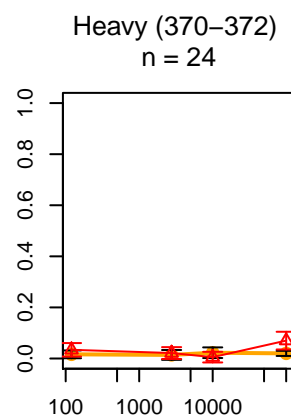

Deuterium exposure(s)

Mass Increase(Da)

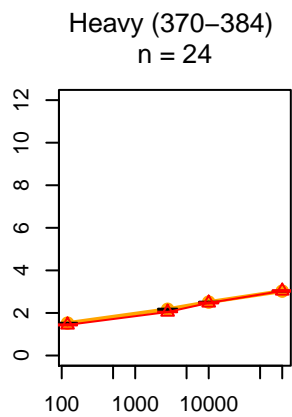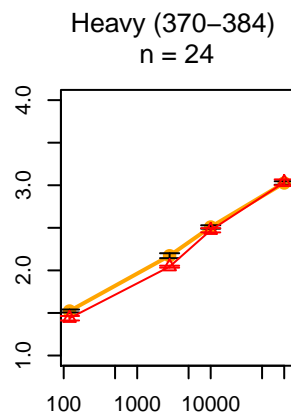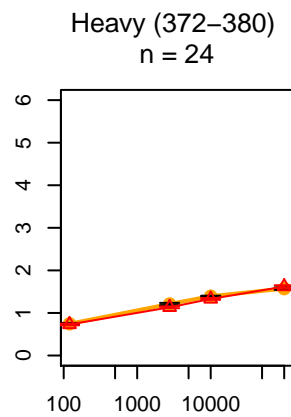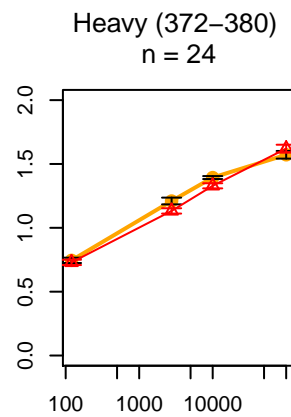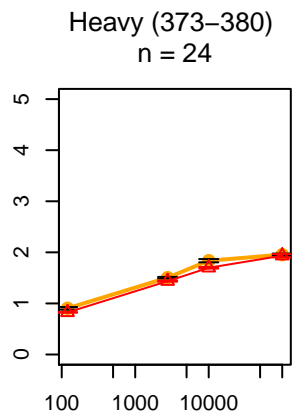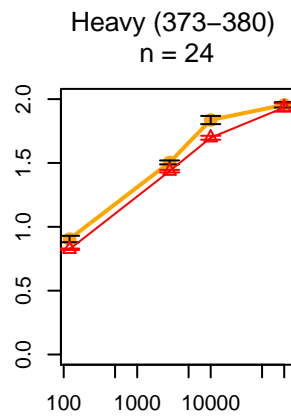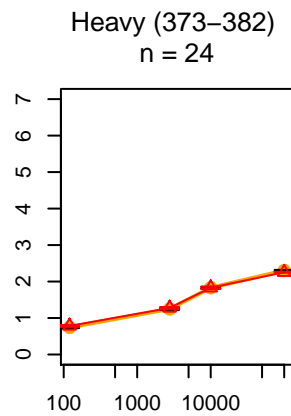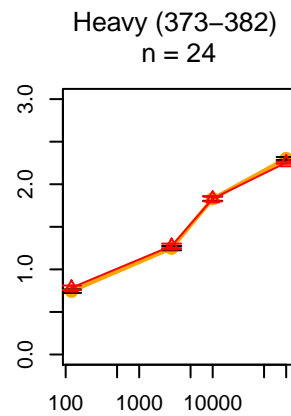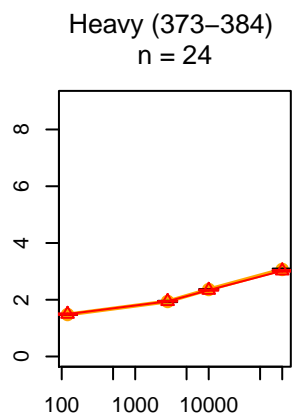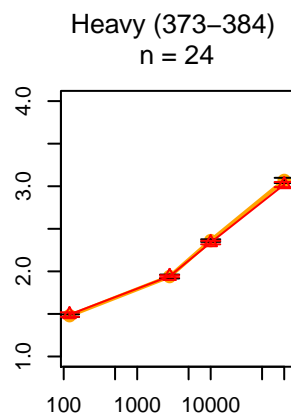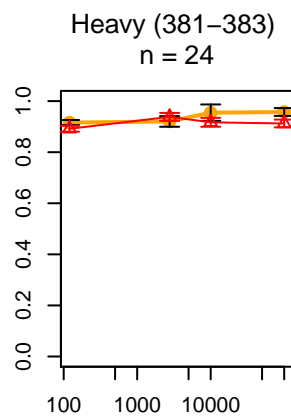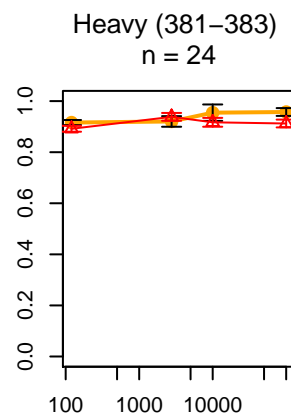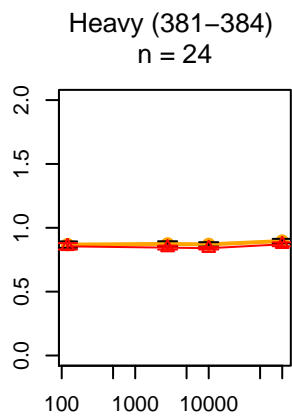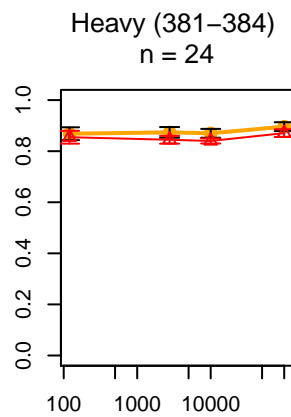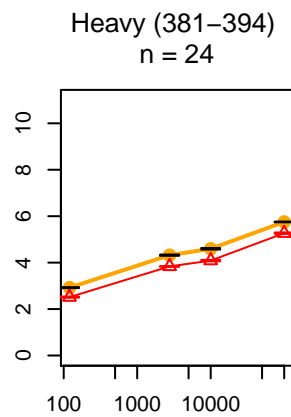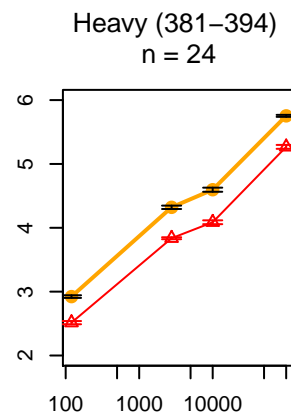

Deuterium exposure(s)

Mass Increase(Da)

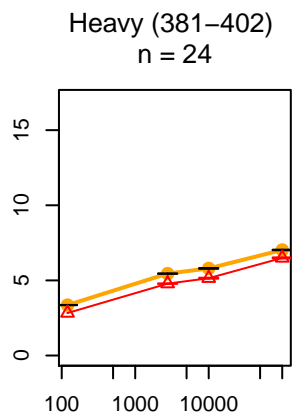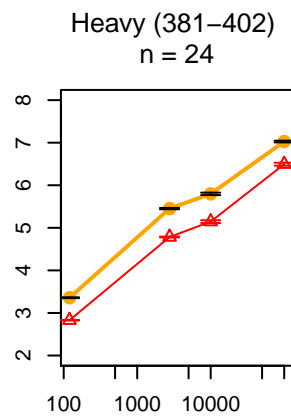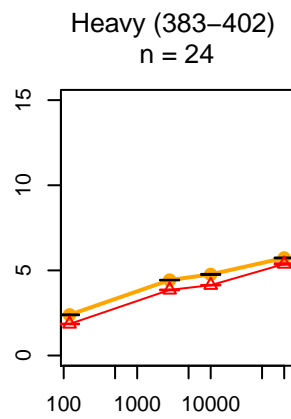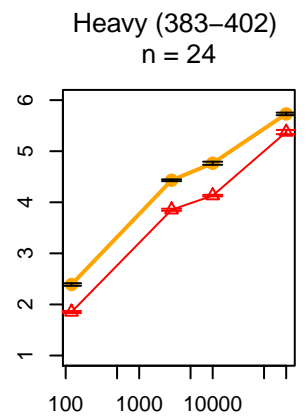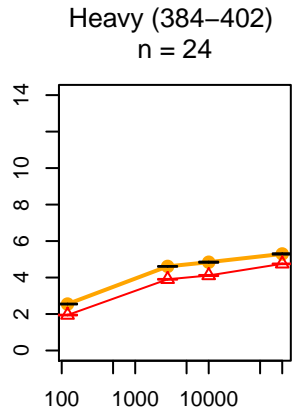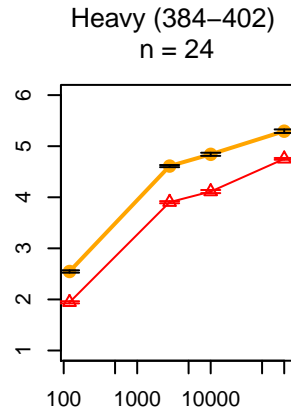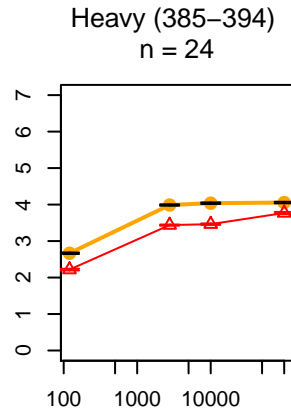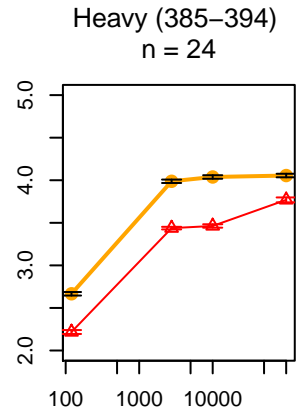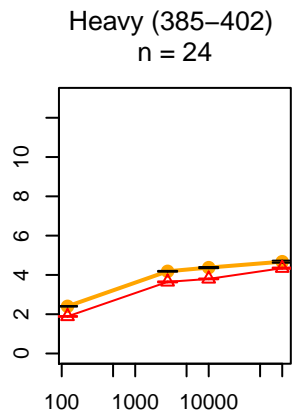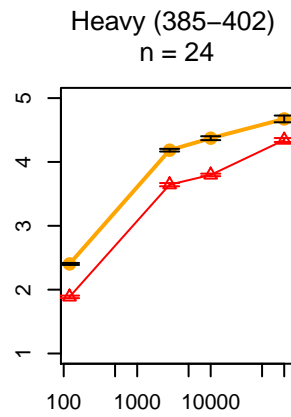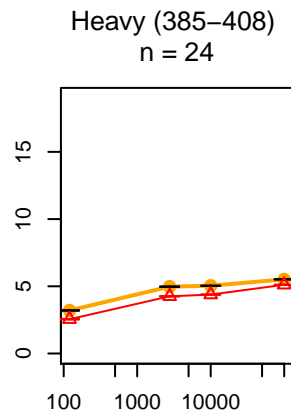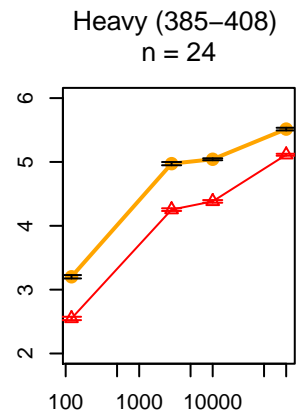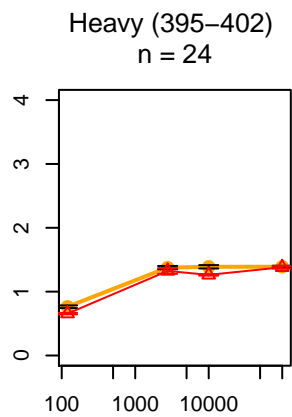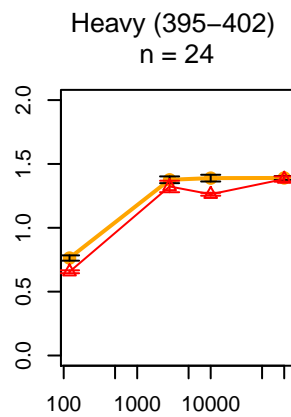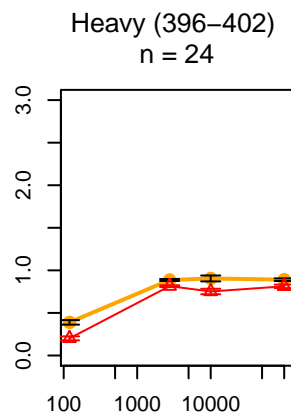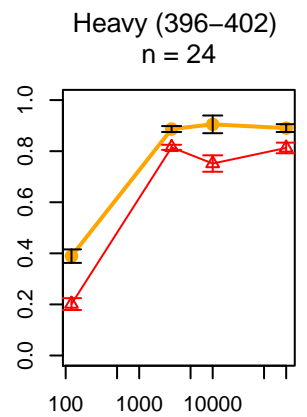

Deuterium exposure(s)

Mass Increase(Da)

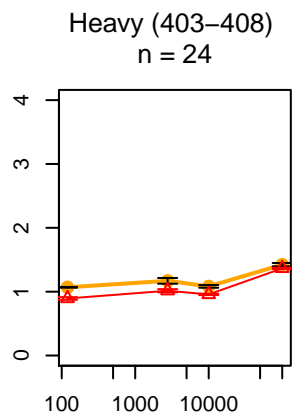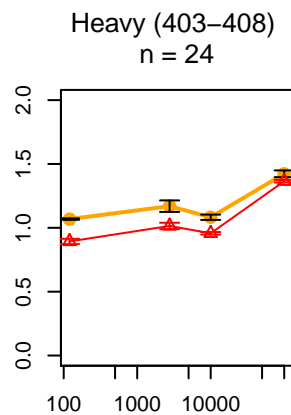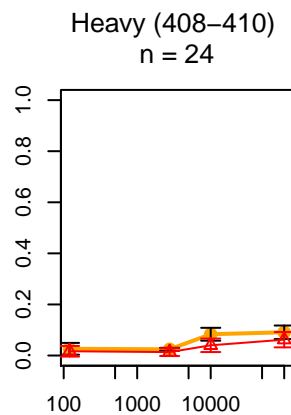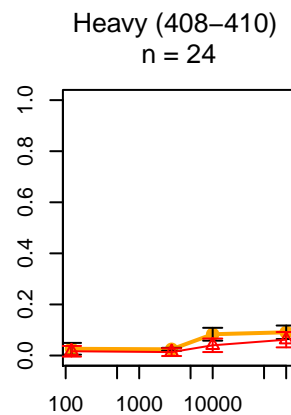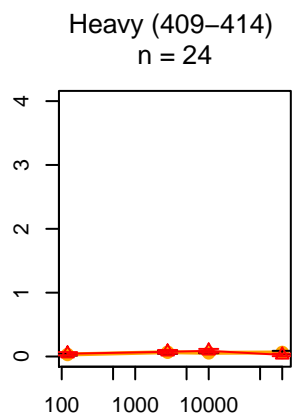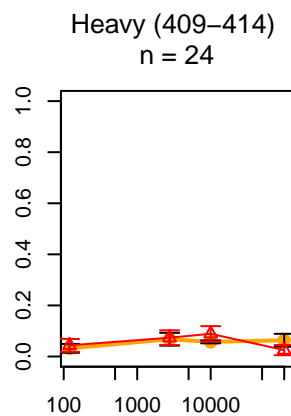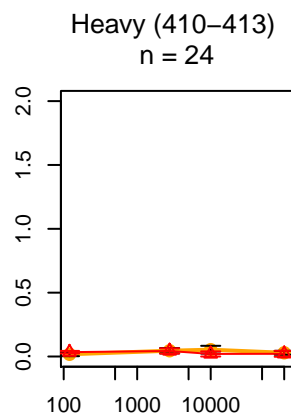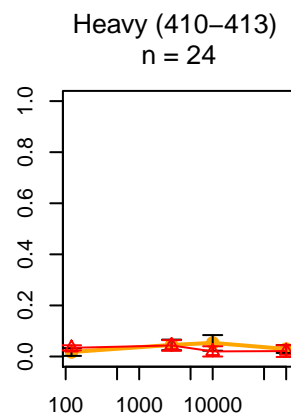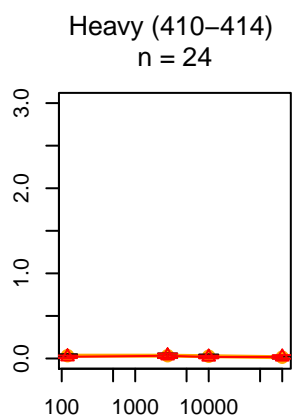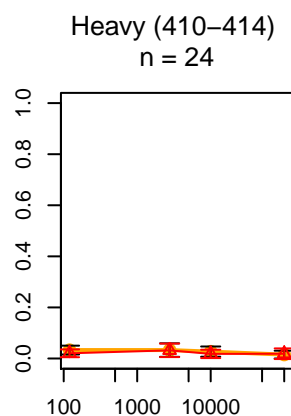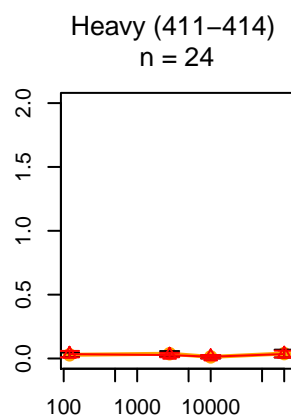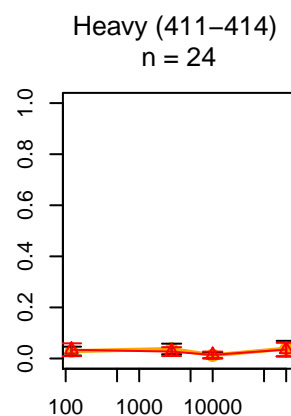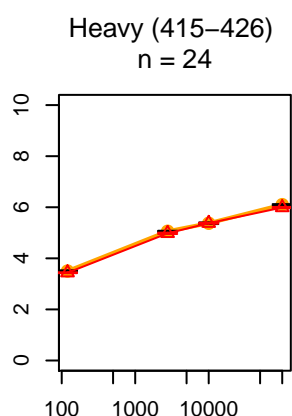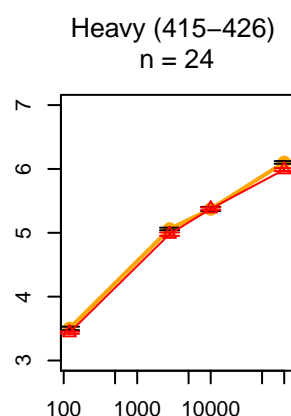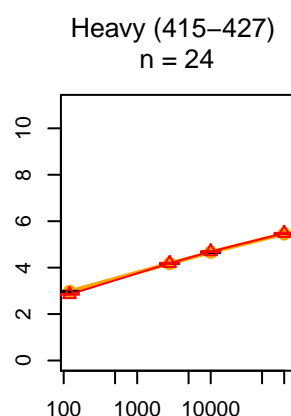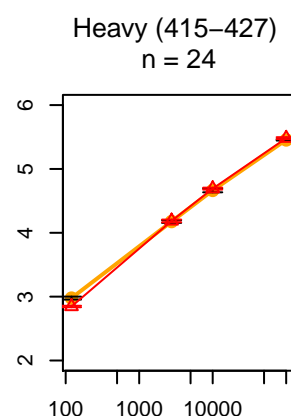

Deuterium exposure(s)



Mass Increase(Da)

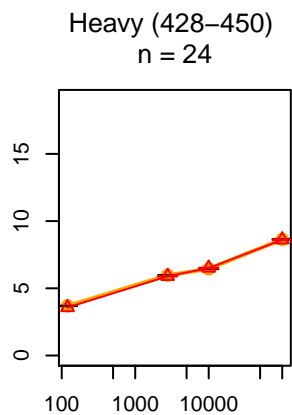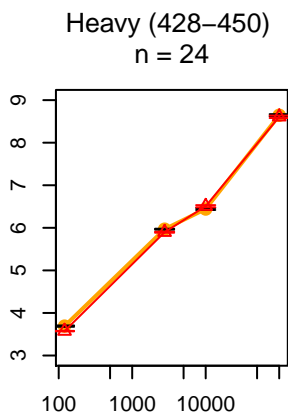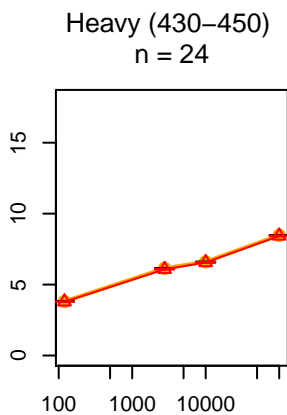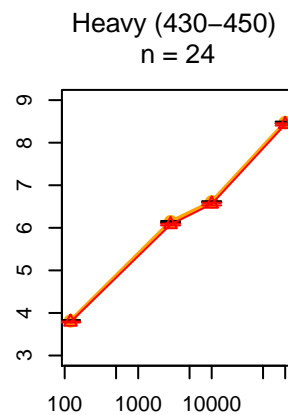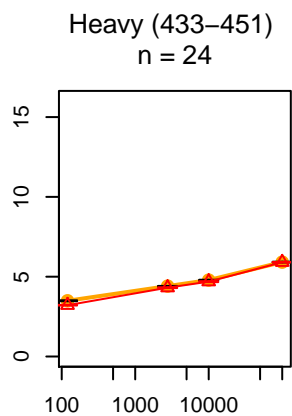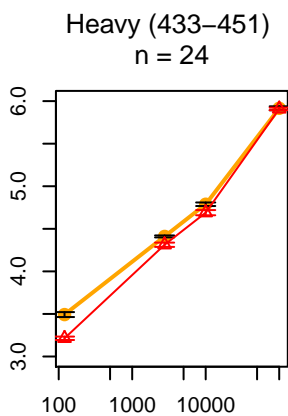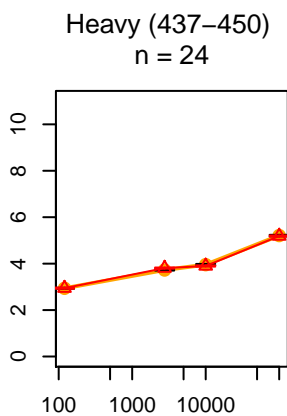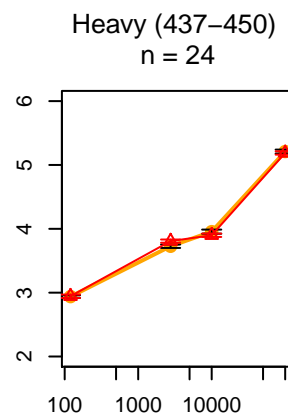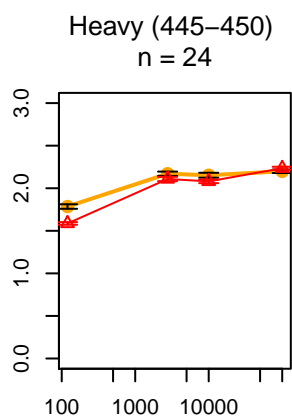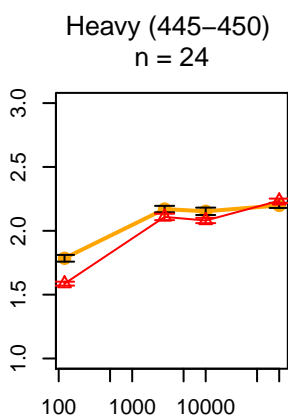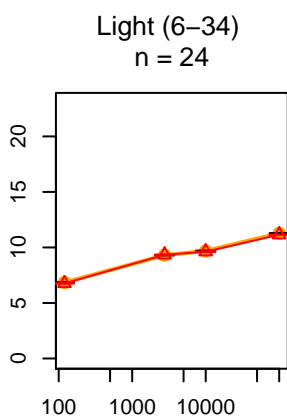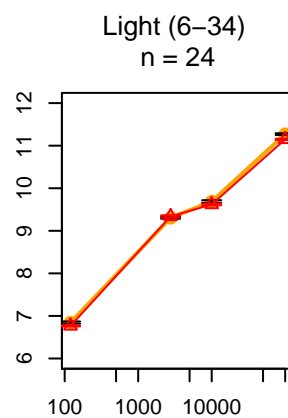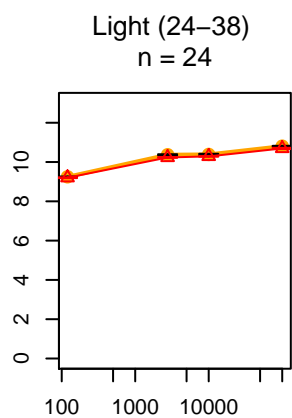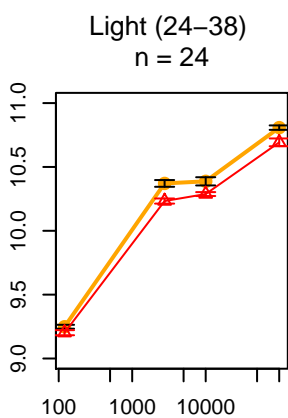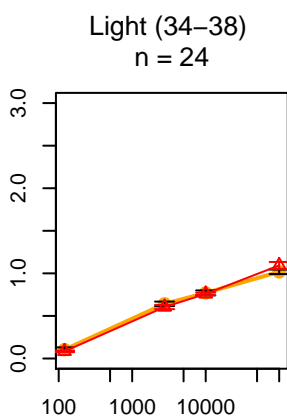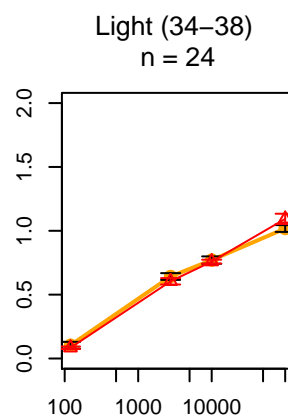

Deuterium exposure(s)

Mass Increase(Da)

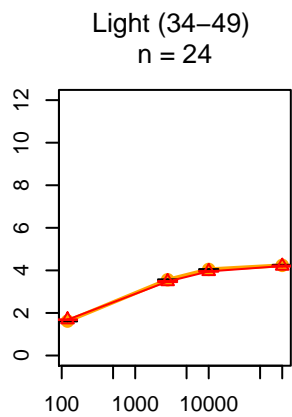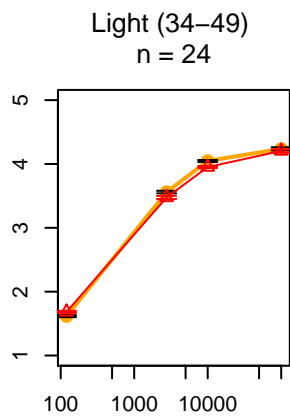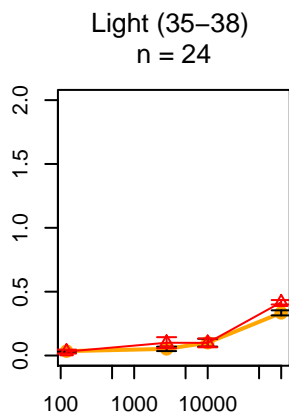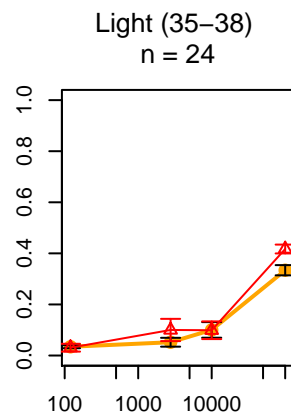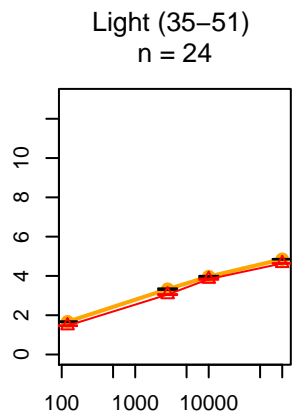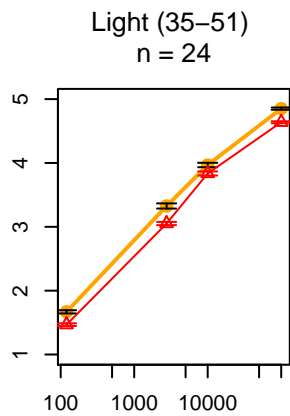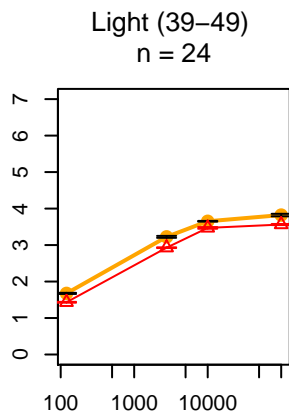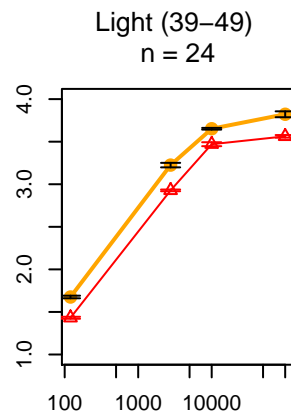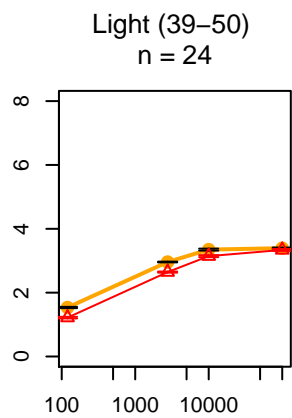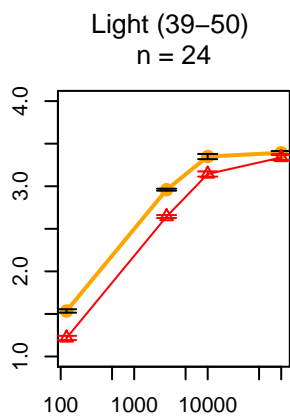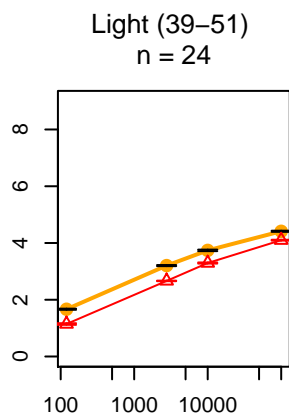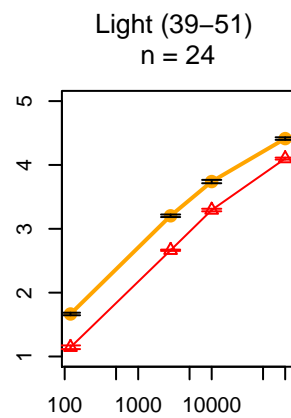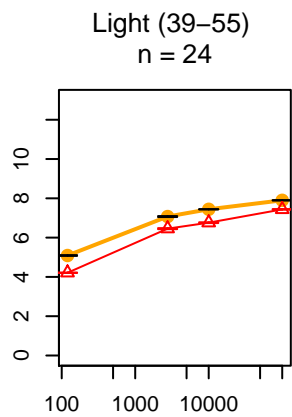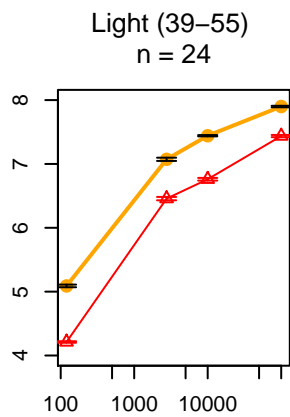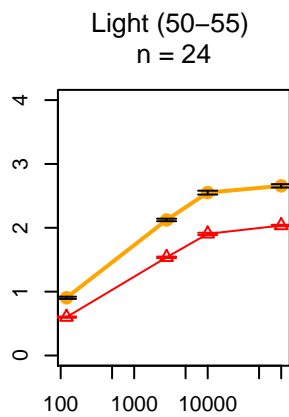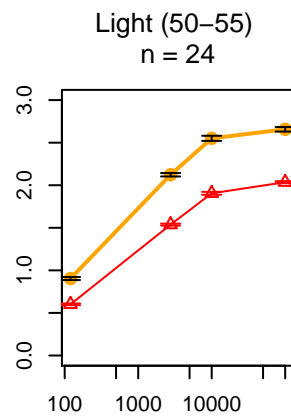

Deuterium exposure(s)

Mass Increase(Da)

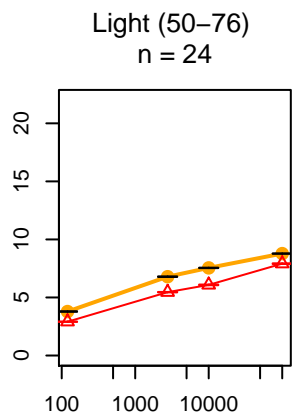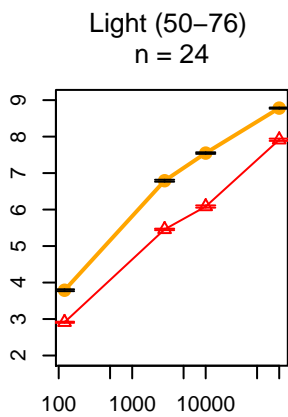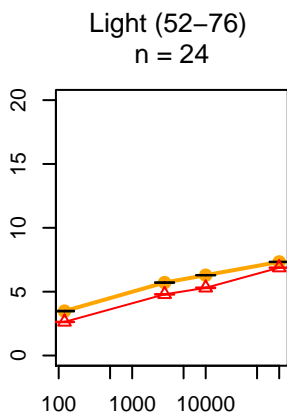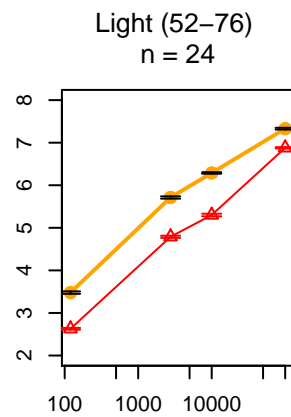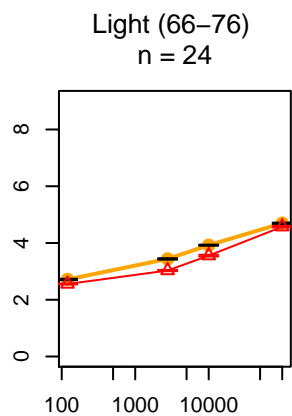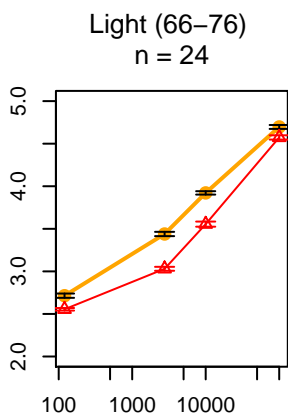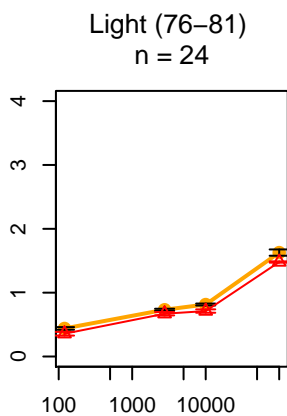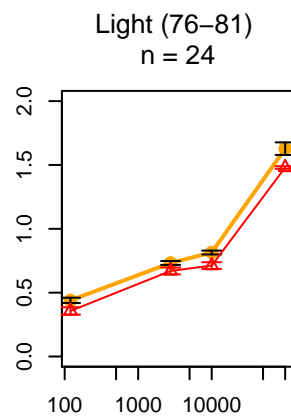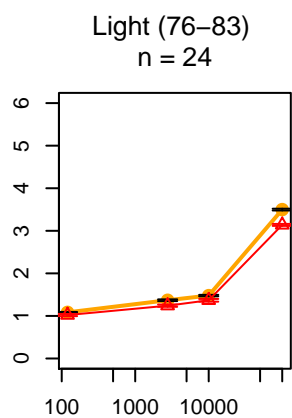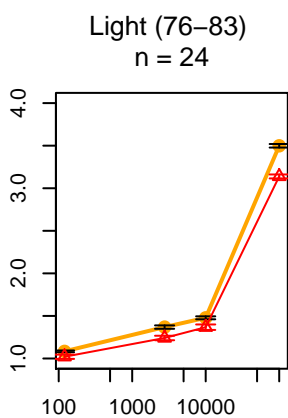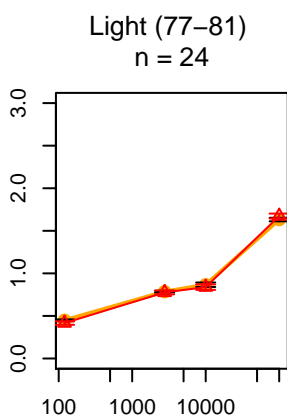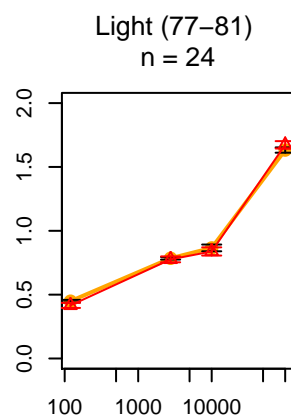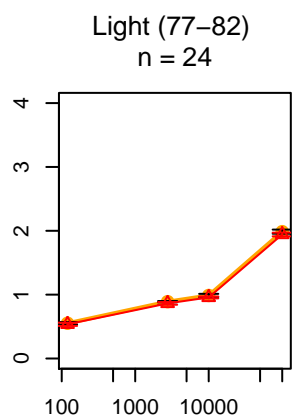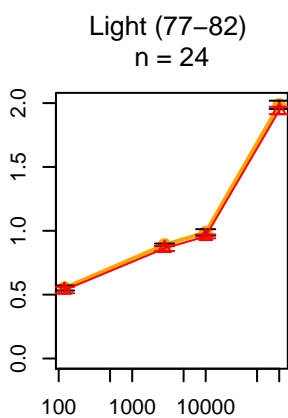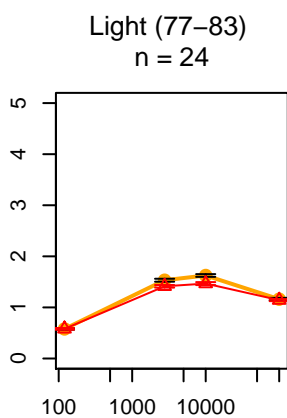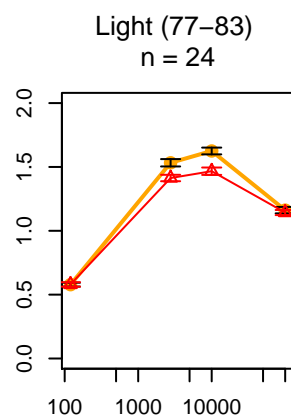

Deuterium exposure(s)

Mass Increase(Da)

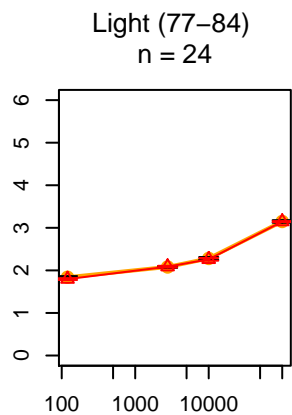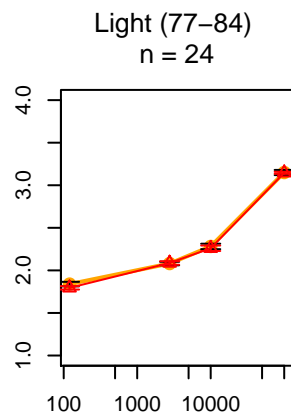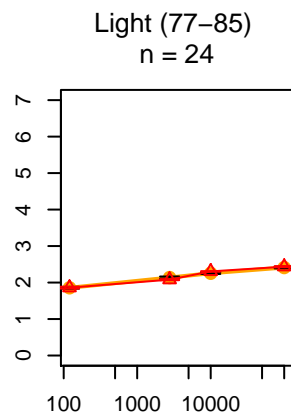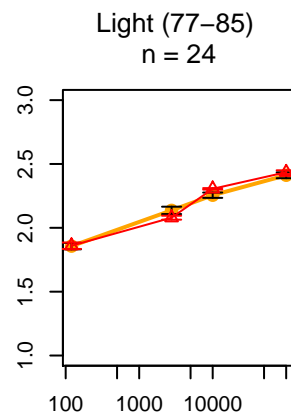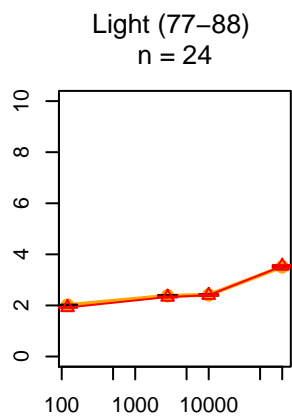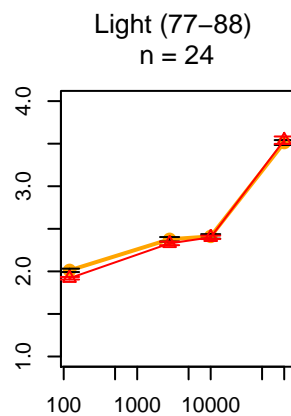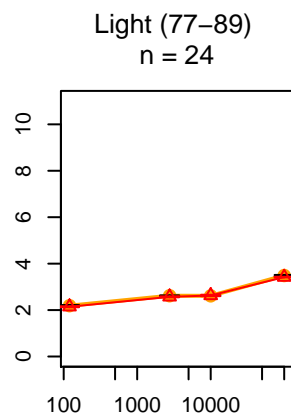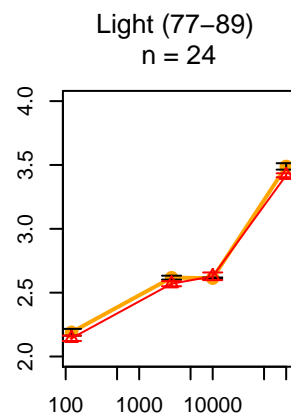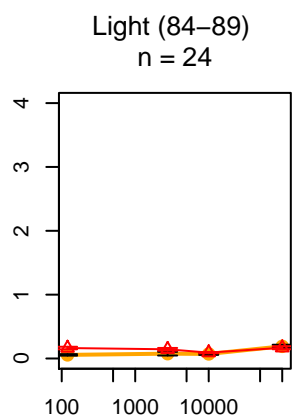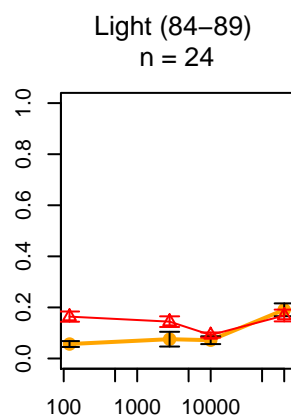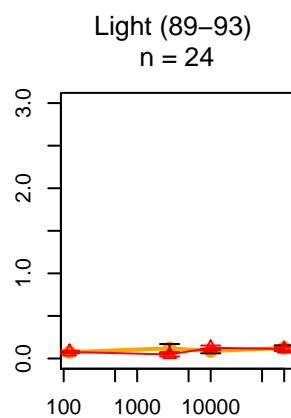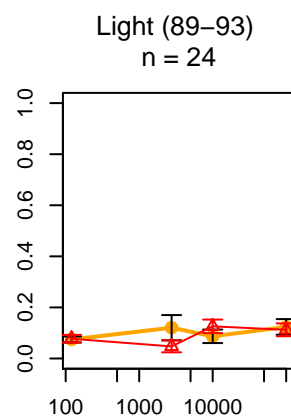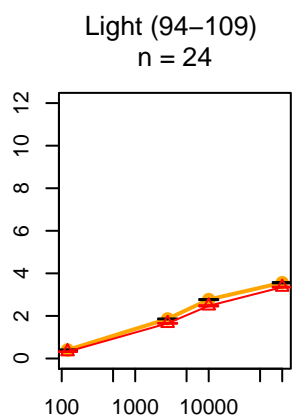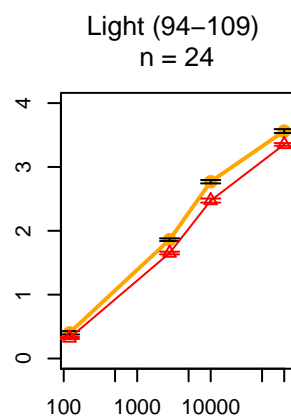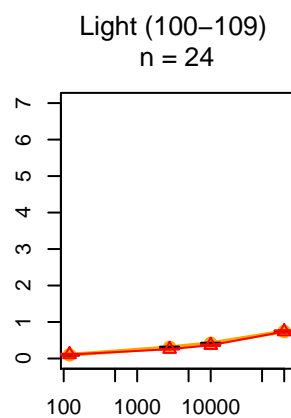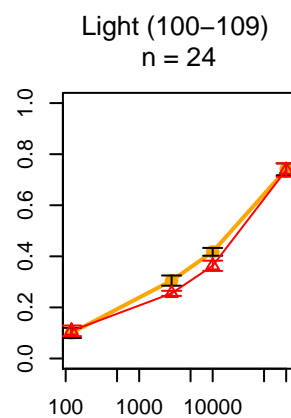

Deuterium exposure(s)

Mass Increase(Da)

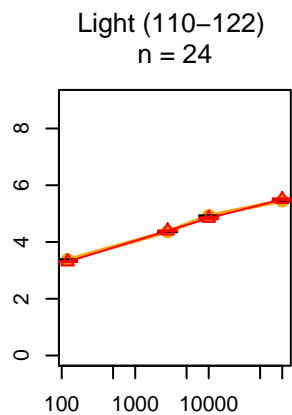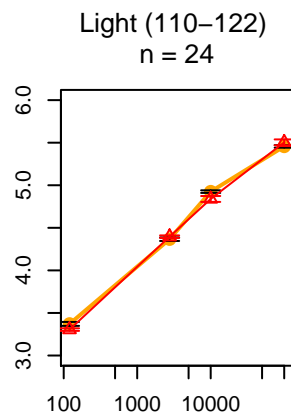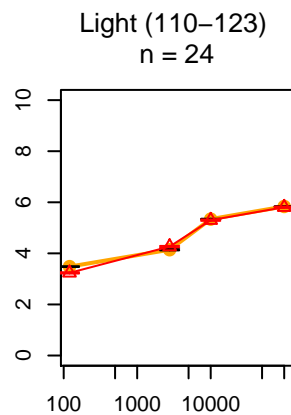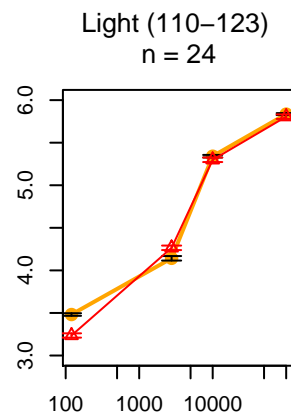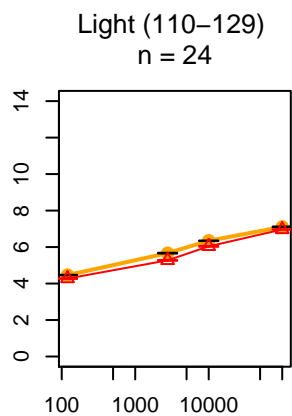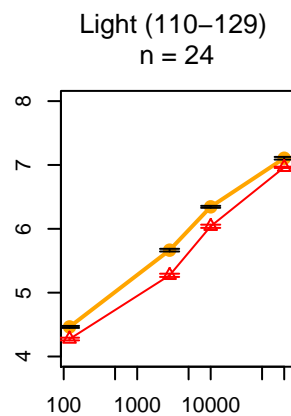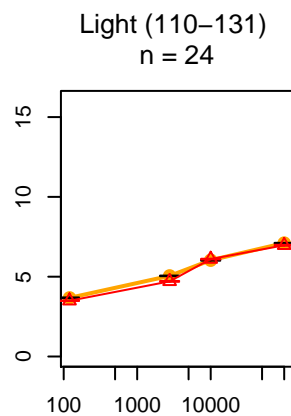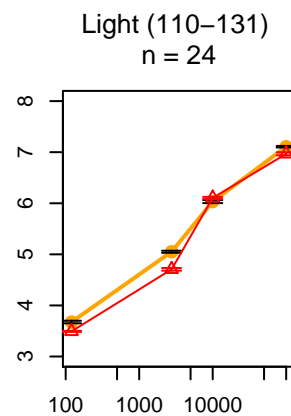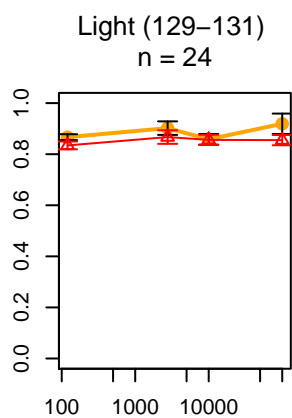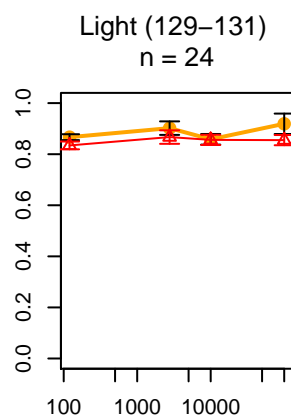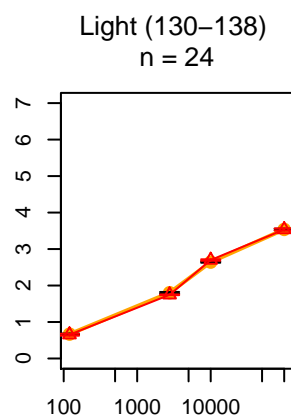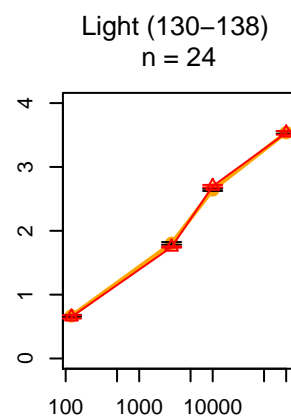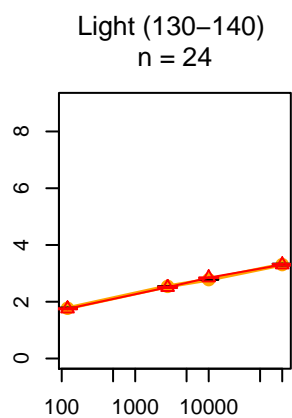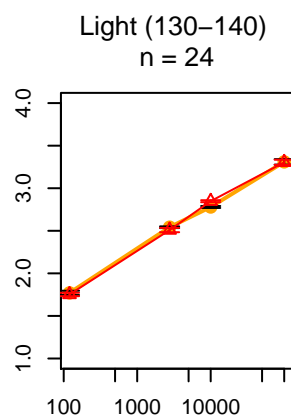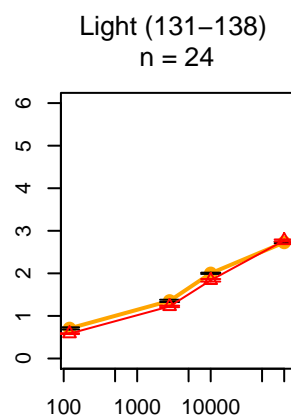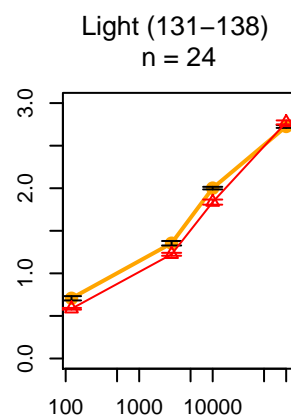

Deuterium exposure(s)

Mass Increase(Da)

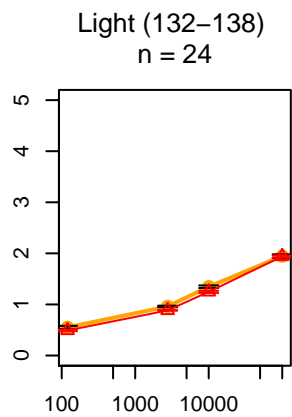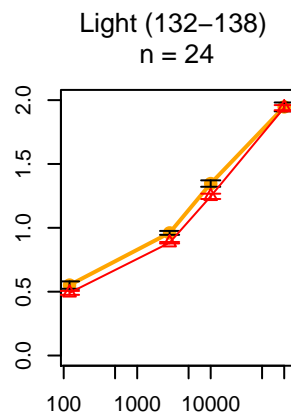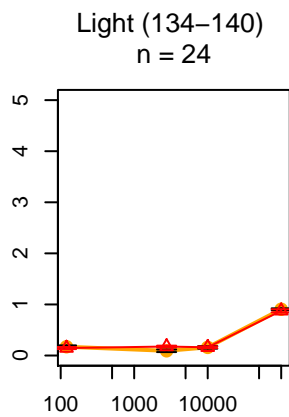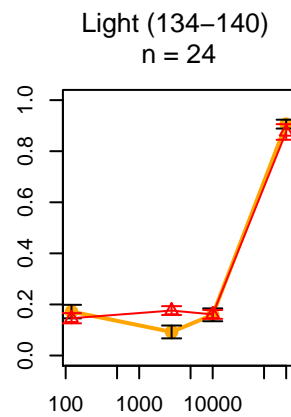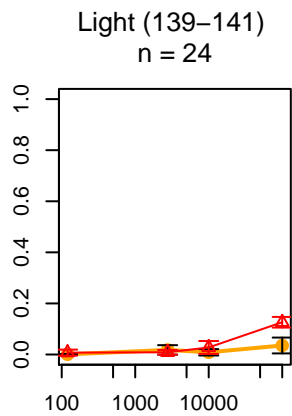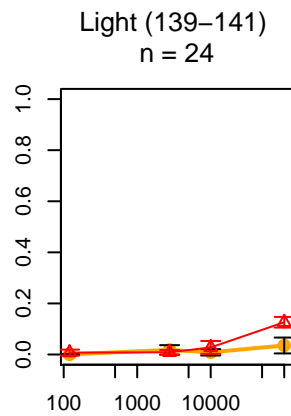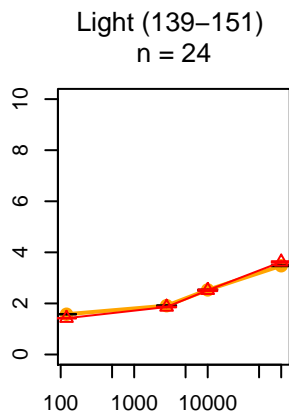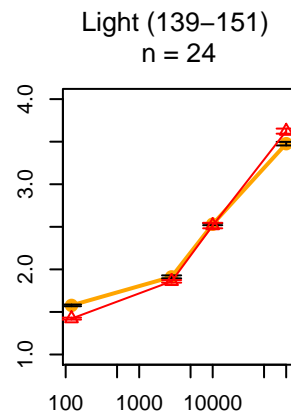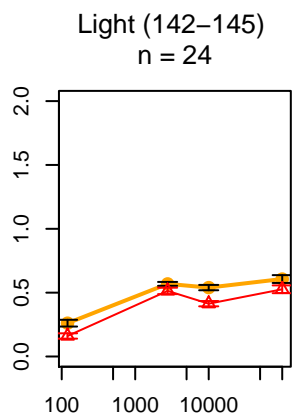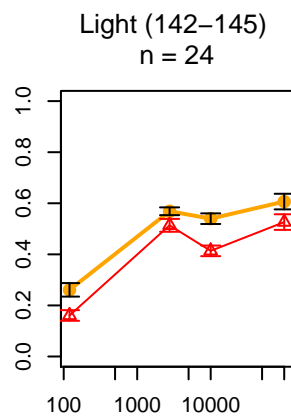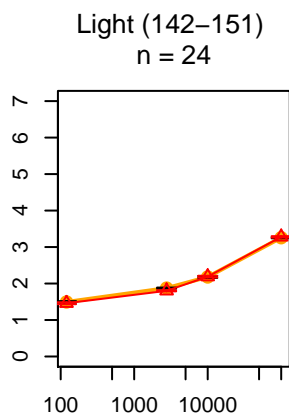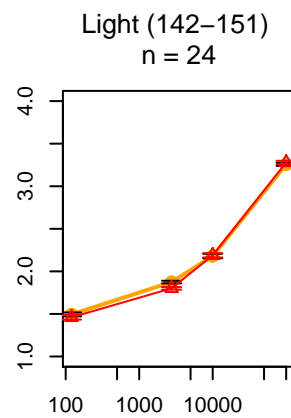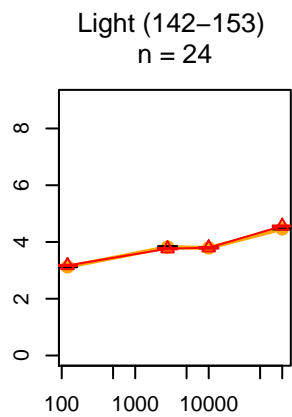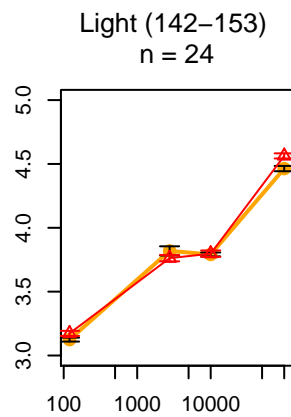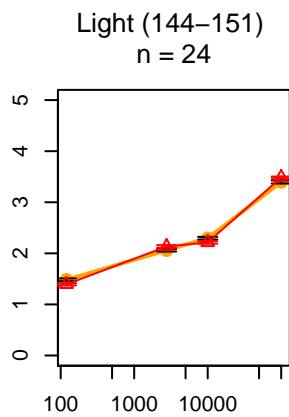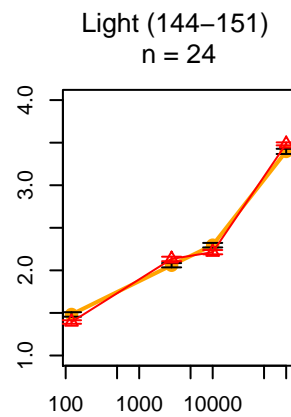

Deuterium exposure(s)

Mass Increase(Da)

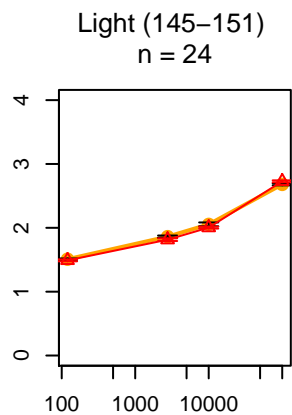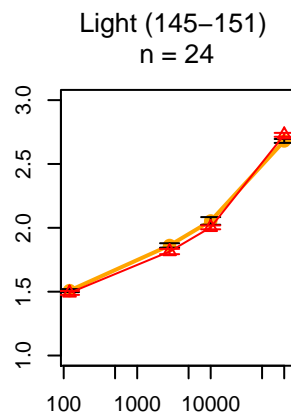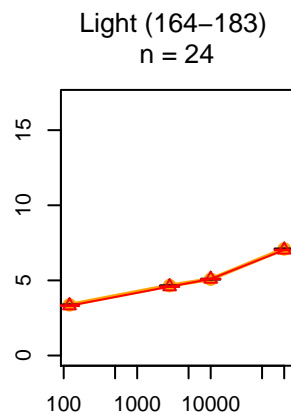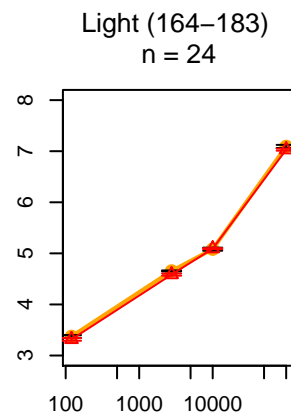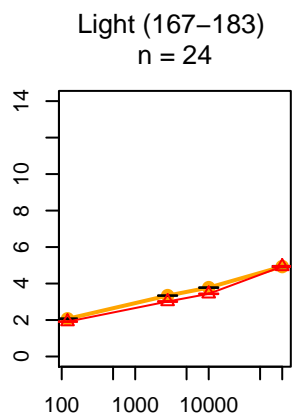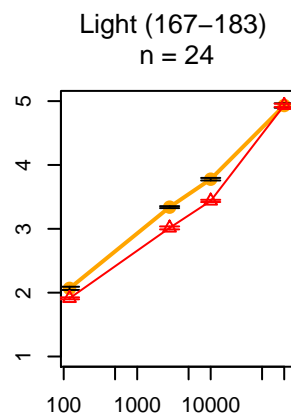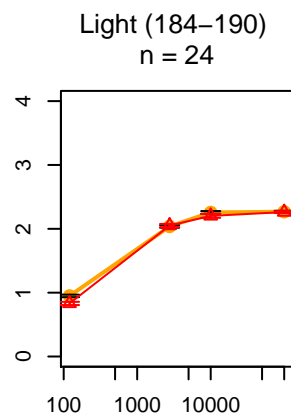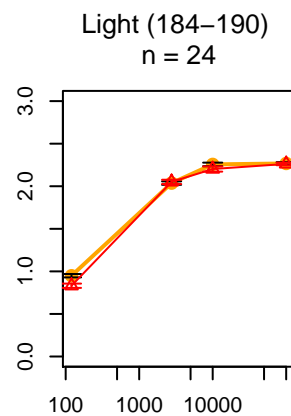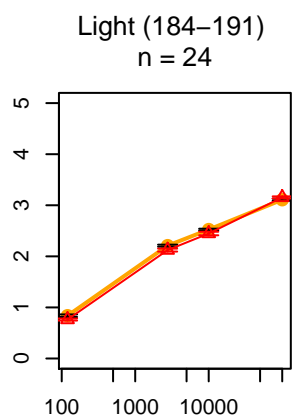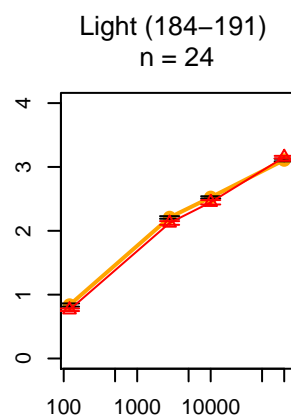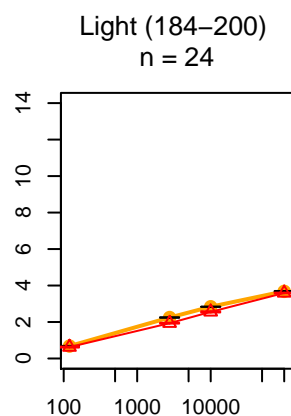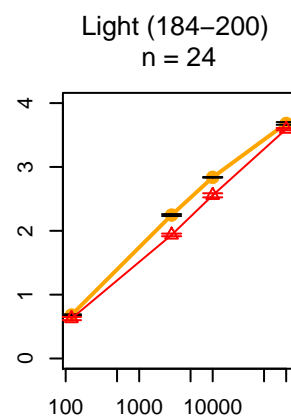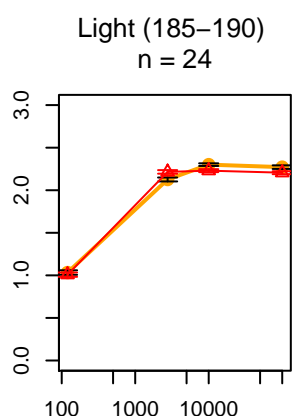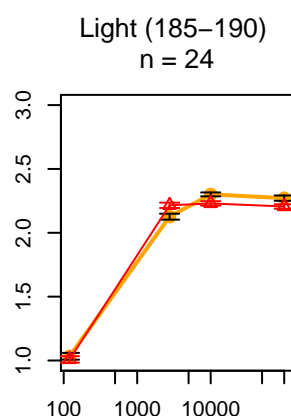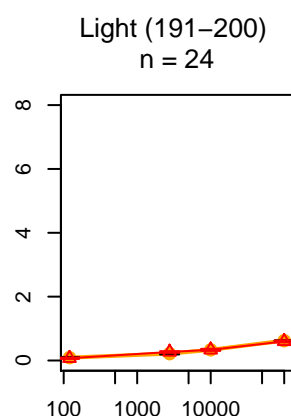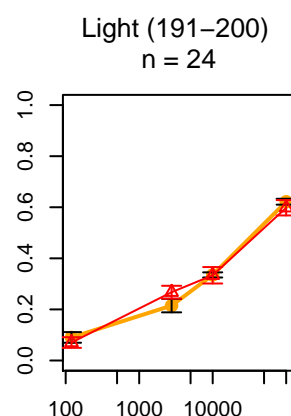

Deuterium exposure(s)

Mass Increase(Da)

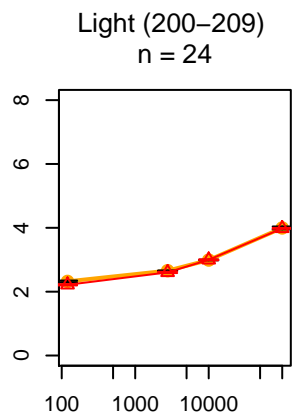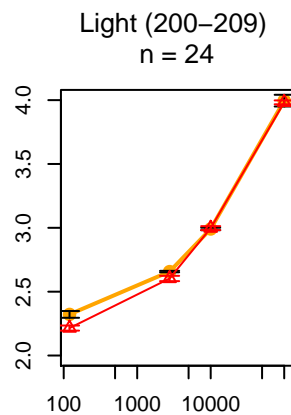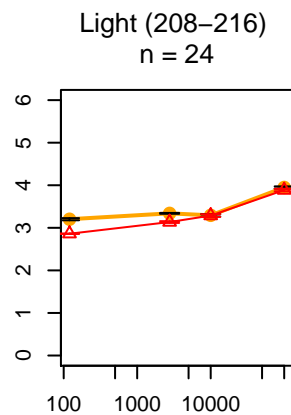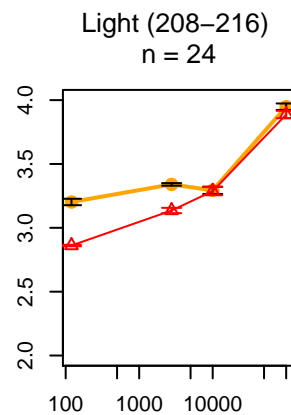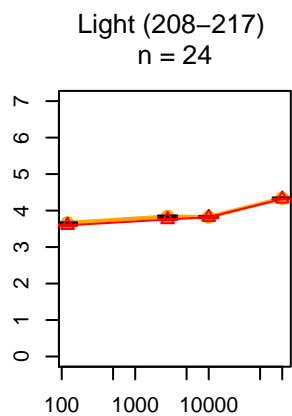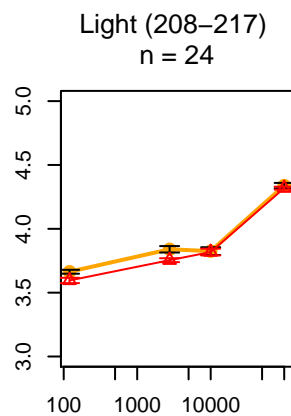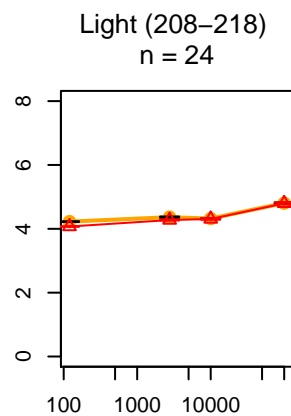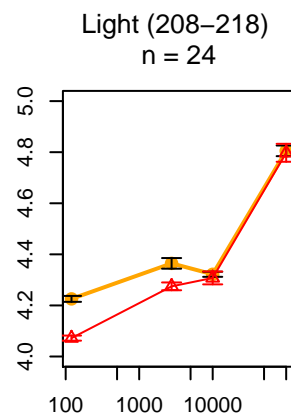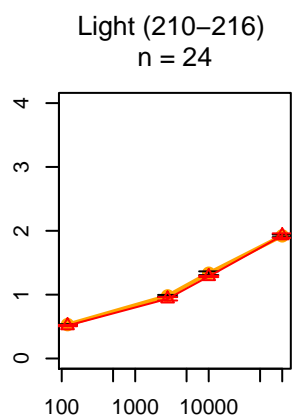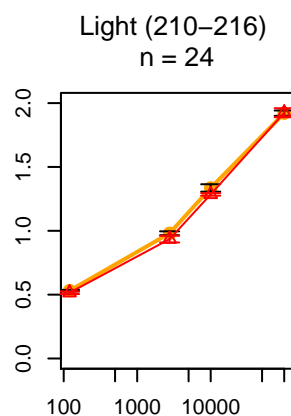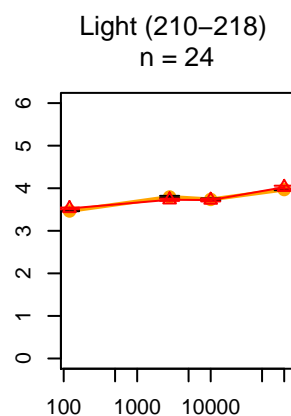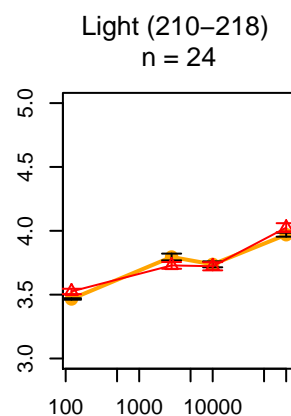

Deuterium exposure(s)



**Figure S4:** Difference plots showing HX differences after 2760 seconds of hydrogen exchange for 182 peptides. The plots compare mAb-J samples at 60 g/L in control containing 10% (w/v) trehalose with mAb-J samples at 60 g/L containing additional (A) 100 mM arginine and (B) 100 mM NaCl,  $\Delta m(t) = m_{60, \text{no additive}}(t) - m_{60, \text{arginine/NaCl}}(t)$ . (Refer to the caption for Figure 5 for a more detailed description of difference plots).

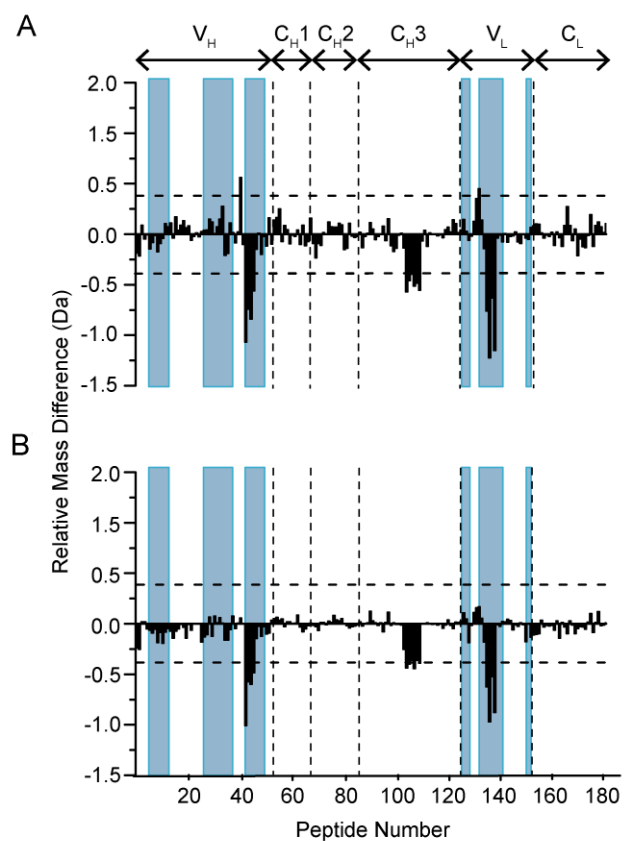

**Figure S5:** Difference plots showing relative mass differences at 2760 second exchange time-point for 182 peptides. The plots compare mAb-J samples at 60 g/L in control containing (A) no additional charged additives, (B) 100 mM arginine and (C) 100 mM NaCl with mAb-J samples at 5 g/L containing no additional charged additives,  $\Delta m(t) = m_{60, \text{arginine/NaCl}}(t) - m_{5, \text{no additives}}(t)$ . (Refer to the caption for Figure 5 for a more detailed description of difference plots).

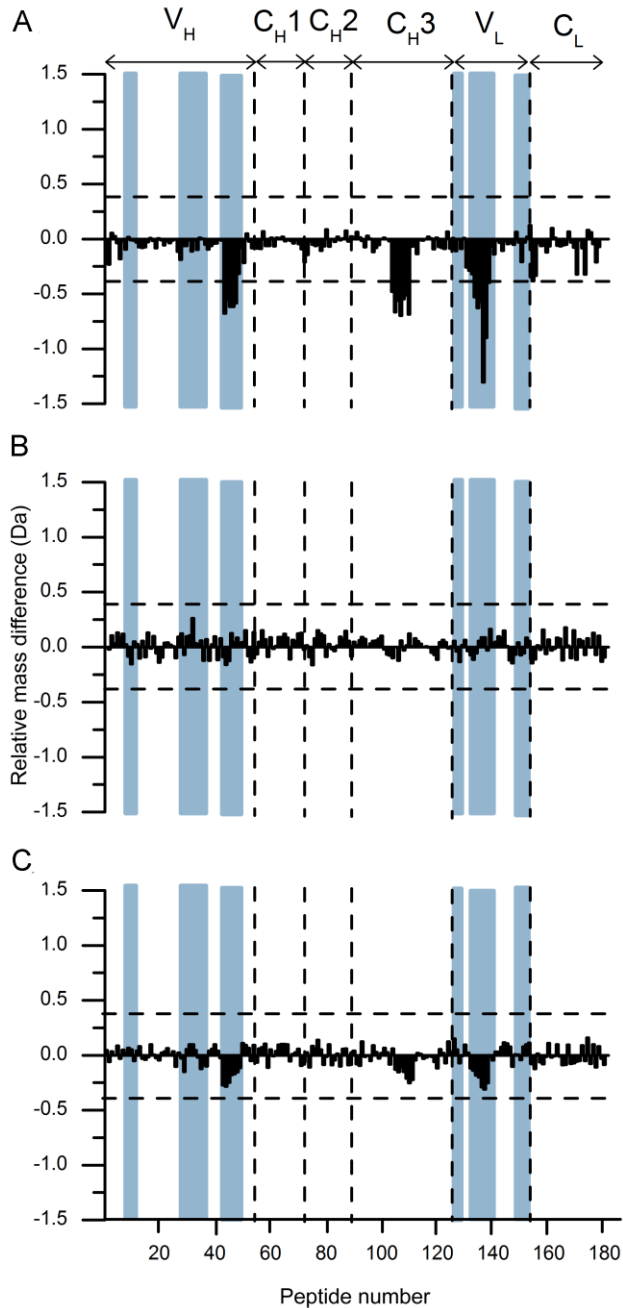

## SUPPLEMENTAL TABLES

**Table S1.** Protein-protein interaction equilibrium models based on best-fit of the static light scattering data of mAb-J. Light scattering experiments were conducted at 25°C. Antibody samples were prepared in the “control buffer” containing 10% (w/v) trehalose at pH 6.0.

| Antibody Association Model       | Chi <sup>2</sup> |
|----------------------------------|------------------|
| Monomer-Dimer                    | 3.2e-2           |
| Monomer-Trimer                   | 7.1e0            |
| Monomer-Trimer-Hexamer           | 2.4e-1           |
| Monomer-Trimer-Hexamer-Isodesmic | 4.7e-0           |
| Monomer-Dimer-Tetramer           | 5.3e-3           |

**Table S2.** Osmotic second virial coefficient values for different mAb-J solution conditions tested. Light scattering experiments were conducted at 25°C. Antibody samples were prepared in the “control” containing control buffer plus 10% (w/v) trehalose at pH 6.0.

| mAb-J Solution Composition | A <sub>2</sub> (osmotic second virial coefficient) |
|----------------------------|----------------------------------------------------|
| Control                    | $-9.6 \times 10^{-5} \text{ mol mL g}^{-2}$        |
| Control + 100 mM NaCl      | $2.0 \times 10^{-5} \text{ mol mL g}^{-2}$         |
| Control + 100 mM arginine  | $9.0 \times 10^{-5} \text{ mol mL g}^{-2}$         |

**Table S3.** Evaluation of lyophilization process on mAb-J aggregation as measured by size exclusion chromatography (SEC). Antibody samples were prepared at 5 and 60 g/L in control buffer. Lyophilized samples were reconstituted with D<sub>2</sub>O. Experimental data are the mean and standard deviation calculated from three independent measurements on three separate lyophilized vials of mAb-J at 5 and 60 g/L.

| mAb-J Sample                   | % Monomer  | % Soluble Aggregates | % Insoluble Aggregates | % Fragments |
|--------------------------------|------------|----------------------|------------------------|-------------|
| 5 g/L,<br>Pre Lyophilization   | 99.6 ± 0.1 | 0.3 ± 0.1            | 0.0 ± 0.1              | 0.1 ± 0.1   |
| 5 g/L,<br>Post Lyophilization  | 98.1 ± 0.8 | 0.4 ± 0.1            | 1.5 ± 0.8              | 0.1 ± 0.1   |
| 60 g/L,<br>Pre Lyophilization  | 99.5 ± 0.1 | 0.4 ± 0.1            | 0.0 ± 0.1              | 0.1 ± 0.1   |
| 60 g/L,<br>Post Lyophilization | 97.7 ± 0.7 | 0.4 ± 0.1            | 1.8 ± 0.8              | 0.1 ± 0.1   |

**Table S4.** Peptic peptides of mAb-J (from HX-MS analysis) with their location on the primary structure and ordinal peptide numbers.

| <b>Peptide Number</b> | <b>Location</b>        |
|-----------------------|------------------------|
| 1                     | mAb-J Heavy 1-22 (VH)  |
| 2                     | mAb-J Heavy 2-10 (VH)  |
| 3                     | mAb-J Heavy 4-10 (VH)  |
| 4                     | mAb-J Heavy 11-22 (VH) |
| 5                     | mAb-J Heavy 17-32 (VH) |
| 6                     | mAb-J Heavy 29-32 (VH) |
| 7                     | mAb-J Heavy 29-35 (VH) |
| 8                     | mAb-J Heavy 30-32 (VH) |
| 9                     | mAb-J Heavy 30-34 (VH) |
| 10                    | mAb-J Heavy 30-35 (VH) |
| 11                    | mAb-J Heavy 30-50 (VH) |
| 12                    | mAb-J Heavy 33-49 (VH) |
| 13                    | mAb-J Heavy 33-50 (VH) |
| 14                    | mAb-J Heavy 34-49 (VH) |
| 15                    | mAb-J Heavy 34-50 (VH) |
| 16                    | mAb-J Heavy 35-49 (VH) |
| 17                    | mAb-J Heavy 35-50 (VH) |
| 18                    | mAb-J Heavy 36-44 (VH) |
| 19                    | mAb-J Heavy 36-49 (VH) |
| 20                    | mAb-J Heavy 36-50 (VH) |
| 21                    | mAb-J Heavy 37-50 (VH) |
| 22                    | mAb-J Heavy 45-50 (VH) |
| 23                    | mAb-J Heavy 47-50 (VH) |
| 24                    | mAb-J Heavy 48-50 (VH) |
| 25                    | mAb-J Heavy 49-59 (VH) |
| 26                    | mAb-J Heavy 50-58 (VH) |
| 27                    | mAb-J Heavy 50-59 (VH) |
| 28                    | mAb-J Heavy 50-60 (VH) |
| 29                    | mAb-J Heavy 51-59 (VH) |
| 30                    | mAb-J Heavy 59-70 (VH) |
| 31                    | mAb-J Heavy 60-66 (VH) |
| 32                    | mAb-J Heavy 60-70 (VH) |
| 33                    | mAb-J Heavy 61-70 (VH) |
| 34                    | mAb-J Heavy 71-79 (VH) |

| <b>Peptide Number</b> | <b>Location</b>           |
|-----------------------|---------------------------|
| 35                    | mAb-J Heavy 71-80 (VH)    |
| 36                    | mAb-J Heavy 71-83 (VH)    |
| 37                    | mAb-J Heavy 81-86 (VH)    |
| 38                    | mAb-J Heavy 82-86 (VH)    |
| 39                    | mAb-J Heavy 84-91 (VH)    |
| 40                    | mAb-J Heavy 84-92 (VH)    |
| 41                    | mAb-J Heavy 87-93 (VH)    |
| 42                    | mAb-J Heavy 92-108 (VH)   |
| 43                    | mAb-J Heavy 97-111 (VH)   |
| 44                    | mAb-J Heavy 101-116 (VH)  |
| 45                    | mAb-J Heavy 104-116 (VH)  |
| 46                    | mAb-J Heavy 109-116 (VH)  |
| 47                    | mAb-J Heavy 110-116 (VH)  |
| 48                    | mAb-J Heavy 110-118 (VH)  |
| 49                    | mAb-J Heavy 111-116 (VH)  |
| 50                    | mAb-J Heavy 117-121 (VH)  |
| 51                    | mAb-J Heavy 117-130 (VH)  |
| 52                    | mAb-J Heavy 117-146 (CH1) |
| 53                    | mAb-J Heavy 150-159 (CH1) |
| 54                    | mAb-J Heavy 160-167 (CH1) |
| 55                    | mAb-J Heavy 160-178 (CH1) |
| 56                    | mAb-J Heavy 163-178 (CH1) |
| 57                    | mAb-J Heavy 167-178 (CH1) |
| 58                    | mAb-J Heavy 168-178 (CH1) |
| 59                    | mAb-J Heavy 172-178 (CH1) |
| 60                    | mAb-J Heavy 179-183 (CH1) |
| 61                    | mAb-J Heavy 184-188 (CH1) |
| 62                    | mAb-J Heavy 184-189 (CH1) |
| 63                    | mAb-J Heavy 184-197 (CH1) |
| 64                    | mAb-J Heavy 184-201 (CH1) |
| 65                    | mAb-J Heavy 187-201 (CH1) |
| 66                    | mAb-J Heavy 189-197 (CH1) |
| 67                    | mAb-J Heavy 189-201 (CH1) |
| 68                    | mAb-J Heavy 190-201 (CH1) |
| 69                    | mAb-J Heavy 202-213 (CH1) |
| 70                    | mAb-J Heavy 229-245 (CH2) |
| 71                    | mAb-J Heavy 239-244 (CH2) |
| 72                    | mAb-J Heavy 239-245 (CH2) |
| 73                    | mAb-J Heavy 239-255 (CH2) |

| <b>Peptide Number</b> | <b>Location</b>           |
|-----------------------|---------------------------|
| 74                    | mAb-J Heavy 239-256 (CH2) |
| 75                    | mAb-J Heavy 245-255 (CH2) |
| 76                    | mAb-J Heavy 245-256 (CH2) |
| 77                    | mAb-J Heavy 246-255 (CH2) |
| 78                    | mAb-J Heavy 246-256 (CH2) |
| 79                    | mAb-J Heavy 257-264 (CH2) |
| 80                    | mAb-J Heavy 257-265 (CH2) |
| 81                    | mAb-J Heavy 266-281 (CH2) |
| 82                    | mAb-J Heavy 267-281 (CH2) |
| 83                    | mAb-J Heavy 270-281 (CH2) |
| 84                    | mAb-J Heavy 282-290 (CH2) |
| 85                    | mAb-J Heavy 304-310 (CH2) |
| 86                    | mAb-J Heavy 305-309 (CH2) |
| 87                    | mAb-J Heavy 305-310 (CH2) |
| 88                    | mAb-J Heavy 311-322 (CH2) |
| 89                    | mAb-J Heavy 313-323 (CH2) |
| 90                    | mAb-J Heavy 338-352 (CH2) |
| 91                    | mAb-J Heavy 340-352 (CH2) |
| 92                    | mAb-J Heavy 353-362 (CH3) |
| 93                    | mAb-J Heavy 353-368 (CH3) |
| 94                    | mAb-J Heavy 353-369 (CH3) |
| 95                    | mAb-J Heavy 361-369 (CH3) |
| 96                    | mAb-J Heavy 363-369 (CH3) |
| 97                    | mAb-J Heavy 363-370 (CH3) |
| 98                    | mAb-J Heavy 370-372 (CH3) |
| 99                    | mAb-J Heavy 370-384 (CH3) |
| 100                   | mAb-J Heavy 372-380 (CH3) |
| 101                   | mAb-J Heavy 373-380 (CH3) |
| 102                   | mAb-J Heavy 373-382 (CH3) |
| 103                   | mAb-J Heavy 373-384 (CH3) |
| 104                   | mAb-J Heavy 381-383 (CH3) |
| 105                   | mAb-J Heavy 381-384 (CH3) |
| 106                   | mAb-J Heavy 381-394 (CH3) |
| 107                   | mAb-J Heavy 381-402 (CH3) |
| 108                   | mAb-J Heavy 383-402 (CH3) |
| 109                   | mAb-J Heavy 384-402 (CH3) |
| 110                   | mAb-J Heavy 385-394 (CH3) |
| 111                   | mAb-J Heavy 385-402 (CH3) |
| 112                   | mAb-J Heavy 385-408 (CH3) |



| <b>Peptide Number</b> | <b>Location</b>           |
|-----------------------|---------------------------|
| 113                   | mAb-J Heavy 395-402 (CH3) |
| 114                   | mAb-J Heavy 396-402 (CH3) |
| 115                   | mAb-J Heavy 403-408 (CH3) |
| 116                   | mAb-J Heavy 408-410 (CH3) |
| 117                   | mAb-J Heavy 409-414 (CH3) |
| 118                   | mAb-J Heavy 410-413 (CH3) |
| 119                   | mAb-J Heavy 410-414 (CH3) |
| 120                   | mAb-J Heavy 411-414 (CH3) |
| 121                   | mAb-J Heavy 415-426 (CH3) |
| 122                   | mAb-J Heavy 415-427 (CH3) |
| 123                   | mAb-J Heavy 428-450 (CH3) |
| 124                   | mAb-J Heavy 430-450 (CH3) |
| 125                   | mAb-J Heavy 433-451 (CH3) |
| 126                   | mAb-J Heavy 437-450 (CH3) |
| 127                   | mAb-J Heavy 445-450 (CH3) |
| 128                   | mAb-J Light 6-34 (VL)     |
| 129                   | mAb-J Light 24-38 (VL)    |
| 130                   | mAb-J Light 34-38 (VL)    |
| 131                   | mAb-J Light 34-49 (VL)    |
| 132                   | mAb-J Light 35-38 (VL)    |
| 133                   | mAb-J Light 35-51 (VL)    |
| 134                   | mAb-J Light 39-49 (VL)    |
| 135                   | mAb-J Light 39-50 (VL)    |
| 136                   | mAb-J Light 39-51 (VL)    |
| 137                   | mAb-J Light 39-55 (VL)    |
| 138                   | mAb-J Light 50-55 (VL)    |
| 139                   | mAb-J Light 50-76 (VL)    |
| 140                   | mAb-J Light 52-76 (VL)    |
| 141                   | mAb-J Light 66-76 (VL)    |
| 142                   | mAb-J Light 76-81 (VL)    |
| 143                   | mAb-J Light 76-83 (VL)    |
| 144                   | mAb-J Light 77-81 (VL)    |
| 145                   | mAb-J Light 77-82 (VL)    |
| 146                   | mAb-J Light 77-83 (VL)    |
| 147                   | mAb-J Light 77-84 (VL)    |
| 148                   | mAb-J Light 77-85 (VL)    |
| 149                   | mAb-J Light 77-88 (VL)    |
| 150                   | mAb-J Light 77-89 (VL)    |
| 151                   | mAb-J Light 84-89 (VL)    |

| <b>Peptide Number</b> | <b>Location</b>          |
|-----------------------|--------------------------|
| 152                   | mAb-J Light 89-93 (VL)   |
| 153                   | mAb-J Light 94-109 (VL)  |
| 154                   | mAb-J Light 100-109 (VL) |
| 155                   | mAb-J Light 110-122 (CL) |
| 156                   | mAb-J Light 110-123 (CL) |
| 157                   | mAb-J Light 110-129 (CL) |
| 158                   | mAb-J Light 110-131 (CL) |
| 159                   | mAb-J Light 129-131 (CL) |
| 160                   | mAb-J Light 130-138 (CL) |
| 161                   | mAb-J Light 130-140 (CL) |
| 162                   | mAb-J Light 131-138 (CL) |
| 163                   | mAb-J Light 132-138 (CL) |
| 164                   | mAb-J Light 134-140 (CL) |
| 165                   | mAb-J Light 139-141 (CL) |
| 166                   | mAb-J Light 139-151 (CL) |
| 167                   | mAb-J Light 142-145 (CL) |
| 168                   | mAb-J Light 142-151 (CL) |
| 169                   | mAb-J Light 142-153 (CL) |
| 170                   | mAb-J Light 144-151 (CL) |
| 171                   | mAb-J Light 145-151 (CL) |
| 172                   | mAb-J Light 164-183 (CL) |
| 173                   | mAb-J Light 167-183 (CL) |
| 174                   | mAb-J Light 184-190 (CL) |
| 175                   | mAb-J Light 184-191 (CL) |
| 176                   | mAb-J Light 184-200 (CL) |
| 177                   | mAb-J Light 185-190 (CL) |
| 178                   | mAb-J Light 191-200 (CL) |
| 179                   | mAb-J Light 200-209 (CL) |
| 180                   | mAb-J Light 208-216 (CL) |
| 181                   | mAb-J Light 208-217 (CL) |
| 182                   | mAb-J Light 210-216 (CL) |
